# Supplementary material
Source: publisher figshare collection journal article supplement (https://gsajournals.figshare.com/ndownloader/files/15544538)
Supplement: Supplementary file 1 [file 15544538]

>atha
ATGTAATCAAATCCCTGCAGAAAAAGCACAAAAATCATAAAACCCTAGCAATGGCGACCCAACCGGCGAAAGAGTCTGTTCAATGTTTCGGAAGGAAGAA
GACGGCAACAGCAGTCACCTACTGCAAACGGGGCTCGGGCATGATTAAGCTCAACGGTTCGCCGATCGAGCTTTATCAGCCAGAGATCCTCCGATTCAAG
ATCTTCGAGCCAGTCCTTCTCCTCGGGAAACACCGTTTCGCCGGAGTTGACATGAGGATCCGTGCCACGGGCGGTGGTAACACATCTCGGGTCTACGCAA
TCCGTCAGAGTATCGCTAAGGCCCTCGTTGCTTACTACCAGAAGTACGTTGATGAGCAGTCGAAGAAGGAGATCAAGGACATCTTGATGAGGTACGATAG
GACTCTTCTTGTTGCGGATCCGAGAAGGTGCGAGTCGAAGAAGTTTGGTGGTCCTGGTGCTCGTGCTCGTTTCCAGAAGAGTTACCGTTAGATTCTGGTT
TGATTTTTTGTTTCTGTATCAACGTTTTGGGATTATGATGTTGAAATTGTGAGACTTGGTTTCTCTTTTGCGTTTTATTTTCAATGGTTATTGGATAATG
TTTCTACTATCGAAAAGTTCTCACAAGCTGTGTTTAGTGTTTACGTAGAATGCTATTGATTCTTCGTTCT
CTCTCTCTCTCAAACACACACCCACTCATGGCGTCTCGGAGAGTCTTATCATCTCTTCTCCGTTCATCTTCCGGTAGATCTGCCGCCAAATTAGGCAACC
GTAACCCCAGGCTTCCTTCTCCTTCACCCGCGCGTCCCGCCGCTCCATGTAGCTACCTCCTCGGCCGCGTCGCCGAGTACGCGACCTCTTCACCTGCAAG
CTCAGCTGCGCCATCTTCTGCTCCTGCTAAGGATGAGGGGAAGAAGACCTATGATTACGGTGGCAAAGGTGCGATCGGGCGTGTTTGCCAGGTCATTGGT
GCCATTGTCGATGTGAGATTTGAGGATCAGGAAGGATTGCCACCAATCATGACATCTCTCGAGGTGCAGGATCACCCCACAAGGCTAGTGCTTGAGGTGT
CTCATCACTTGGGTCAGAATGTCGTCAGGACCATTGCTATGGATGGTACTGAGGGTCTCGTTCGTGGAAGGAAAGTCCTCAACACTGGCGCTCCAATCAC
TGTACCTGTCGGAAGGGCTACTCTTGGACGTATCATGAATGTTCTTGGAGAACCTATTGACGAAAGAGGCGAAATTAAGACCGAACATTACTTACCTATT
CACAGAGATGCACCGGCTTTGGTTGATCTAGCTACTGGGCAAGAGATCCTGGCCACTGGTATTAAGGTTGTTGATCTTCTTGCTCCTTACCAAAGAGGAG
GAAAGATTGGTCTCTTTGGCGGTGCTGGTGTTGGGAAAACTGTGCTTATTATGGAGCTGATCAACAATGTTGCCAAAGCTCATGGTGGTTTCTCTGTGTT
TGCTGGTGTGGGAGAACGAACCCGTGAAGGCAATGACTTGTACAGAGAAATGATTGAGAGTGGTGTCATCAAGCTAGGCGAAAAGCAGTCTGAGAGCAAG
TGTGCTCTAGTGTACGGACAAATGAATGAGCCCCCGGGTGCCCGTGCCCGTGTTGGACTGACTGGTTTGACTGTTGCCGAGTATTTCCGTGATGCTGAAG
GCCAAGACGTTTTGCTTTTCATTGACAACATTTTCCGTTTCACTCAGGCCAACTCTGAAGTGTCTGCTTTACTCGGTCGTATCCCGTCTGCTGTGGGATA
CCAGCCAACTCTGGCTTCTGATCTTGGTGCTCTTCAAGAGCGAATTACTACCACCAAGAAAGGGTCTATCACCTCAGTCCAAGCCATCTATGTACCTGCT
GATGATTTGACTGATCCTGCTCCTGCTACAACTTTTGCTCACTTGGACGCCACAACTGTGCTCTCAAGACAGATTTCTGAGCTTGGTATCTACCCTGCTG
TGGATCCTTTGGATTCAACATCCCGTATGCTGTCACCTCACATTCTGGGAGAGGAGCATTACAACACGGCTCGTGGCGTGCAGAAAGTTCTACAGAACTA
CAAGAACTTGCAAGATATTATTGCAATTTTGGGTATGGATGAGCTAAGTGAAGATGACAAGTTGACTGTTGCCCGTGCCCGTAAGATCCAGAGATTCTTG
AGTCAGCCGTTCCACGTTGCTGAGATCTTCACTGGTGCCCCTGGAAAATATGTCGACCTTAAAGAAAATATCAACAGTTTCCAGGGTTTGTTGGATGGCA
AGTACGATGATCTTTCCGAACAATCGTTTTACATGGTTGGAGGTATCGATGAGGTGGTTGCAAAGGCAGAGAAGATCGCTAAAGAGTCAGCAGCTTAAGA
GATTGATTCAGATCTTTCATGCTTAATACTTCTCTTTTTTTTCCTGACAATAACGAAAAAAAAAAACCAATGCGTGCGACTCTCCGACCAAACGGAATCT
GAGTTCCGTAATTATAGTTTCTTTTGGTTCAAATTCCATGAGAGCTGGCAAGATGATACTGAACAGATCCATTCACTGTTAATCAAATTTTTGGTTGTTT
TGCTTCCTTTGTTGAAATAAAGATGAAAAATCTTGCAGATTCTAATTGCAATATGTGTTTAAGATTTCTTGATGCC
GAGAAAGTAAAGAGAAAAACCCTAATCTTCATCTTCATCTTCTCCCGCCGTCGGCCGTAAGAGGTTTCGAAGAAGCAAAGTGAGCAACAATGGCGGGAGG
CAAGATCAGGAAGGAGAAGCCCAAGGCTTCGAATAGAGCACCATCGAACCATTACCAAGGAGGAATATCGTTCCACAAATCGAAAGGGCAACATATCCTT
AAGAACCCTCTGCTTGTGGATTCGATCGTTCAGAAAGCTGGTATCAAGAGTACCGATGTGATTCTCGAGATCGGTCCCGGTACTGGAAACTTGACCAAGA
AGCTTCTAGAAGCTGGCAAAGAAGTTATCGCCGTCGAACTTGACTCTCGTATGGTTCTCGAGCTTCAGCGCCGTTTTCAAGGAACTCCCTTCTCTAACCG
CTTGAAGGTAATTCAAGGGGATGTGCTCAAGACGGAGCTTCCCAGGTTTGACATATGTGTGGCAAACATTCCGTATCAGATATCATCTCCTCTCACATTC
AAACTTCTCTTCCATCCAACAAGCTTCAGATGTGCTGTCATCATGTACCAGAGGGAATTCGCCATGAGACTCGTTGCCCAGCCTGGTGACAATCTCTACT
GCCGTCTCTCTGTCAACACTCAGCTTTATGCCAGAGTCTCCCACCTCCTCAAAGTCGGCAAGAACAATTTCCGCCCTCCTCCAAAGGTGGATTCTTCCGT
TGTCAGGATCGAACCAAGGAGGCCTGGCCCTCAGGTTAACAAGAAGGAGTGGGATGGGTTCTTAAGAGTCTGTTTCATCAGAAAGAACAAAACCTTGGGA
TCCATTTTCAAGCAAAAGTCTGTTCTTTCCATGCTGGAGAAGAACTTCAAGACTCTTCAGGCCGTACTAGCTTCGTTGCAGAACAATGGAGAACCTGCTT
TGAACACCACCTCCATGGATCTTGGTGACCAGAGCATGGGAATGGAAGATGACGACAACGAAATGGATGACGATGATATGGAGATGGATGAGGGAGAAGG
AGACGGAGGAGAAACATCAGAGTTCAAGGAGAAAGTTATGAATGTCTTGAAGGAAGGTGGTTTCGAGGAGAAGAGATCTTCAAAGCTATCACAACAAGAG
TTTTTGTATCTTCTTTCCTTGTTCAACAAGTCTGGTATTCACTTCACATAATCGTTTTGTGGTGTGAAAGTTTTGTCCTTACTTATTACTATTGTTCAAG
TTTTAACATTTGGAAGTGAAAATCAATCAAAGTCTTTGAGTTACTGACGCAACCC
TTTCCTATTTATGTCTTCTGAGATCTCTCGTAGACTCTTACAGTGATTAACTCAGGCTGCTAAGGGAGATGGCAACGGCGATGGCGGAGGATACGAGCTT
CGAGGGAGACCAACTAGCTTCCATGACTACTGATGACATCGGTAGAGCTTCTCGTCTCTTAGCCAACGAGATTCGCATCCTCAAGGAAGAATCGCAGAGG
ACAAACCTTGATTTGGAATCAGTGAAGGAGAAAATAAAGGAGAACCAGGAGAAGATTAAGCTTAACAAACAGCTTCCTTACTTAGTTGGCAATATCGTTG
AGATTCTTGAGATGAGTCCAGAGGATGATGCAGAGGAAGATGGAGCGAATATCGATCTGGACTCTCAGAGGAAGGGAAAGTGTGTCGTTCTAAAAACATC
AACTCGTCAGACCATCTTCCTCCCTGTTGTTGGACTTGTTGATCCAGATACATTGAAGCCTGGGGACTTAGTTGGAGTTAACAAAGATAGTTACTTGATT
CTGGATACTTTACCTTCTGAGTATGATTCAAGAGTAAAAGCAATGGAGGTCGACGAAAAACCTACTGAAGACTACAATGATATAGGGGGACTAGAAAAAC
AGATACAAGAACTTGTTGAAGCCATTGTGTTGCCAATGACTCATAAAGAGCAGTTCGAAAAGTTGGGTATCCGTCCACCAAAAGGTGTACTCTTGTATGG
TCCTCCTGGAACCGGAAAGACGTTGATGGCCCGAGCTTGTGCAGCACAGACAAATGCAACTTTCCTCAAACTAGCAGGGCCACAACTTGTTCAGATGTTC
ATCGGAGATGGAGCAAAACTTGTCCGTGATGCTTTCCTGCTTGCAAAAGAGAAATCCCCTTGTATTATATTCATAGATGAGATTGACGCAATAGGGACAA
AGCGTTTTGATAGCGAAGTTAGTGGAGACCGTGAGGTACAAAGGACAATGTTGGAGCTGCTCAACCAGCTTGATGGATTCAGCAGCGATGATCGCATTAA
GGTTATTGCAGCGACAAATCGTGCTGATATACTAGATCCTGCCCTTATGCGTTCTGGTCGTTTGGATCGTAAAATCGAGTTTCCGCACCCCACTGAAGAA
GCTAGAGGCAGGATCTTACAGATACATTCAAGGAAAATGAATGTGAATGCAGACGTCAATTTTGAAGAGCTTGCTCGGTCAACGGATGATTTCAATGGAG
CTCAACTCAAAGCAGTGTGTGTTGAAGCGGGTATGCTTGCCCTGCGCCGGGATGCAACTGAGGTGAACCATGAGGATTTCAATGAAGGTATAATTCAAGT
ACAAGCCAAGAAGAAAGCAAGCTTGAATTACTACGCCTAAGTCCTCTTTTATGTACACTCTTCTTTCTCCTCTTTACATTATAGAAAACTTCAAGTTGTA
GTCTCAACTTTTGAATCTAGAACCCCTTCAAAGTGTGGTTATAATTATAATAGATATCAGCTTGACATATTTTGCTTATTATTTTCT
AAAAACTTGATTATTTTTTTTAAAAACATAAGATAGAACAATTTAGTCGAGCCCATACGAAACTACGCCGTATCATTCGGCCCAGCCCTTTGATTAAAAA
ATTAAACGCACTGTGAGTCTGTGAAATCTCCTCGGCTTCAACTTCCGGATTAAGGGGAAGAGATGAAATTCTGAAATCCCTTGAGAGAAAGATTTGTTTC
GCCTCTCAAAACATTTTCAATTCCCGCCAATTTTCTTCTCCGAGAATACCCCCAACCTTCTAGAAACCCTAATTTGGTTTAATTTCATTCTCCACTACTT
TCTCTGAAACCAAACTCGAGATCTCTCCCCCAATCATGCCTGCGATACAATCCCCATCGGGGAAGATCTTGCAGCTTGAGATGGAGAATTTCAAATCTTA
CAAGGGTCATCAATTGGTTGGTCCTTTCAAGGATTTCACTGCTATTATTGGTCCCAACGGTTCTGGCAAATCTAACCTAATGGACGCTATTAGCTTCGTC
CTCGGCGTTCGTACCGGTCAACTTCGTGGTTCTCAGCTTAAGGATCTTATCTACGCTTTTGATGATCGTGACAAGGAACAGAGAGGTCGTAAAGCTTTTG
TTCGACTCGTTTATCAGATGGACGATGGAGTAGAGCTTCGTTTCACTCGTTCTATTACTAGCGCTGGTGGGAGTGAGTACCGTATTGATAATAGGGTTGT
GAATTTGGATGAGTACAATGGGAAGCTACGATCTCTTGGGATACTTGTTAAGGCTCGTAATTTCTTGGTCTTTCAGGGTGATGTTGAATCTATTGCTTCG
AAGAATCCAAAAGAACTTACTGGACTCCTCGAGGAGATTTCTGGTTCCGAGGAGCTTAAGAAAGAGTATGAAGGACTAGAAGAAAAGAAGGCCAGCGCTG
AAGAAAAAGCAGCTCTTATATACCAGAAGAAGAAAACAATTGGAAATGAGAAGAAGCTGAAGAAAGCACAAAAGGAAGAAGCTGAGAAGCATCTAAGGCT
GCAGGAAGAACTGAAAGCTCTGAAGAGAGAACGCTTCCTATGGCAATTATATAACATTGAAAATGATATCGAGAAGGCGAATGAGGATGTTGATTCTGAA
AAGAGCAATCGTAAAGATGTCATGAGAGAGCTGGAAAAGTTTGAACGTGAGGCAGGTAAGAGAAAGGTAGAGCAAGCAAAGTATCTGAAAGAAATTGCTC
AACGTGAGAAGAAGATTGCTGAGAAAAGCTCGAAGCTTGGAAAAATTCAGCAACCTGAGCTTCTGAGATTTAAGGAGGAGATAGCTCGCATAAAAGCAAA
AATTGAGACCAATAGAAAGGACGTGGATAAGAGGAAAAAAGAAAAAGGGAAGCATTCCAAAGAAATTGAACAGATGCAGAAAAGCATTAAGGAGCTGAAT
AAGAAAATGGAATTATTTAATAAGAAGAGACAAGATAGCAGCGGAAAACTCCCAATGCTTGACAGTCAACTGCAAGATTATTTTCGACTAAAAGAAGAAG
CTGGAATGAAAACCATTAAGCTAAGAGATGAGCACGAGGTTCTAGAGAGGCAACGGCGTACCGATCTTGAAGCATTGAGAAATCTGGAAGAAAATTACCA
GCAACTAATAAATAGGAAGAATGATCTTGATGAACAAATTAAGCGATTTAAAGACAGGCAAGGAGAGATTGAAACATCTTCGTCGAAATATAAGAATGAA
ACAACTAGTCTGAAAACGGAGTTACGTGCACTGCAAGAGAAGCACGTAAATGCCAGGGAGGCCTCTGCGAAGTTGAAGACTAGAATCGCGGAATTAGAAG
ACCAGTTAAGTGATTTAACGGCTGAAAGGTATGAAAATGAGAGAGATAGTAGGCTAACACAGGCTGTTGAGTCTCTCAAGCGTCTATTTCAAGGAGTTCA
TGGTCGGATGACTGATCTTTGTCGGCCAAATCGGAAGAAGTATAACCTTGCTGTCACTGTTGCCATGGGAAGATTTATGGATGCAGTAGTTGTAGAAGAT
GAAAACACGGGAAAGGATTGCATCAAGTACTTGAAAGAGCAAAGGCTTCCTCCTATGACATTTATTCCTCTTCAGTCAGTACGTGTCAAGCAAGTGTTTG
AAAGATTGAGAAATTTGGGTGGCACAGCAAAGCTGGTGTTCGATGTTATCCAATATCCTTTGCATATAAGTGAAGTTTCTAAAATATATATTTTTGTCCT
TAACTACTCCACGTTCGATCCTGAATTGGAGAAGGCGGTTCTCTATGCTGTTGGAAATACTCTTGTCTGCGACGAACTTGAAGAAGCCAAGGTTCTTAGC
TGGAGCGGAGAGAGATTTAAAGTTGTGACTGTTGATGGTATATTACTCACAAAGGCGGGAACAATGACTGGTGGTACAAGTGGTGGAATGGAAGCAAAGT
CTAATAAATGGGATGATAAGAAAATTGAAGGTTTGAAGAAAAATAAAGAAGATTTCGAACAACAACTAGAAAATATTGGATCTATTCGAGAAATGCAAAT
GAAAGAGTCTGAAATATCGGGTAAAATAAGTGGACTTGAAAAAAAGATTCAGTATGCTGAAATTGAGAAGAAAAGTATCAAAGACAAACTTCCACAGCTT
GAGCAAGAGGAGCGGAATATCATTGAAGAAATTGATCGCATAAAACCTGAACTCTCTAAGGCAAGAACTGAGGTCGATAAGAGAAAGACAGAAATGAATA
AGTTGGAGAAAAGAATGAATGAGATCGTGGACCGTATCTATAAGGATTTTAGCCAGTCTGTTGGGGTTCCAAACATACGTGTATATGAAGAAACTCAGCT
CAAGACTGCTGAAAAGGAGGCTGAAGAAAGGCTGGAACTGAGTAACCAGCTTGCTAAGTTAAAATACCAGCTGGAATATGAGCAAAACCGTGATGTGGGG
TCACGGATTCGAAAGATAGAGTCTTCTATCAGTTCTCTGGAAACTGATTTGGAAGGTATACAGAAGACAATGTCTGAACGTAAGGAGACAGCGGTAAAAA
TAACTAATGAAATCAACAATTGGAAGAAGGAAATGGAAGAGTGCAAACAAAAGTCGGAGGAGTATGAGAAGGAAATCCTGGATTGGAAAAAGCAGGCTTC
TCAAGCGACAACAAGCATAACCAAGCTCAATCGTCAAATACATTCGAAGGAAACACAAATTGAGCAGCTGATCTCACAGAAACAGGAAATAACTGAGAAG
TGTGAGCTCGAACATATTACCCTTCCTGTCTTATCAGATGCTATGGAGGAAGATGATTCAGATGGGCCACAGTTTGACTTTAGTGAGCTGGGTAGAGCTT
ATCTCCAAGAACGGAGACCATCTGCTCGTGAAAAAGTGGAGGCAGAATTTAGGCAGAAAATAGAATCTAAAACATCCGAGATTGAAAGAACGGCTCCAAA
TTTGAGAGCGCTTGACCAGTATGAGGCTATACAAGAGAAAGAAAAACAAGTTAGCCAGGAGTTTGAAGCGGCCAGGAAAGAGGAGAAGCAAGTAGCGGAT
GCCTTTAATACTGTTAAGCAGAAGAGGTATGAGCTATTTATGGAAGCTTTCAACCACATTGCTAGCAACATTGACAAGATCTATAAGCAACTAACCAAGA
GTAATACGCACCCACTGGGTGGGACTGCTTATCTAAACCTAGAAAATGAGGATGATCCGTTTCTACATGGTATAAAGTATACTACAATGCCCCCAACAAA
GCGATTTCGTGACATGGAACAGCTCTCTGGAGGAGAGAAAACAGTTGCGGCCTTGGCGTTGCTCTTCTCCATACATAGCTATAGGCCTTCACCCTTTTTC
ATACTTGATGAAGTGGATGCTGCGCTTGATAATCTAAACGTGGCAAAAGTTGCTAAATTCATTCGTAGCAAGTCATGCCAAGCCGCACGTGACAATCAGG
ATGCAGAGGATGGGAATGGCTTCCAAAGCATTGTAATATCTCTCAAGGACAGCTTCTATGACAAGGCGGAGGCTCTGGTTGGAGTTTACAGAGACACCGA
GAGGAGTTGCTCAAGTACAATGTCATTTGACCTTAGGAACTACCAAGAATCGTGATTGGTTCAACAACCCTCGGGGGATTAGGGTTTAGGTAAGTATAAG
AACCCTAACTTTGTAAGTATAGCAAGTACTGAATGATGTTTGATTGTTAGGTTTGTAATTTTTGTGTCACAATGTTAAAAGGTATTTCACAGTGGTAAGG
TGCTTTATTTGCGATTTGATTTGGCATAGGACCTTATAAGTTCTGACACTGTAGAGAACCTATGGAACCTTTTCTTATGTGATACTATAAGAAACTCGTG
ATTTTAGC
>atri
ATGGCGACCGAAGCAGTGCAGGCTGTTGAGTCCGTCCAATGCTTCGGACGAAAGAAAACAGCAGTCGCAGTGACTTACTGCAAAAGAGGCCGAGGTCTCA
TCAAGATCAATGGCTGTCCTATCGAGCTTATGAGCTCTGACATCCTTCGTTACAAGGCTTATGAACCTATCTTAGTTCTTGGTCGCCATCGGTTTGCAGG
CGTCGACATGAGGATTAGGGTTAAGGGAGGAGGTCAAACCTCTCGCATCTATGCCATTAGGCAGAGCATTGCTAAGGCTCTGGTTGCTTTCTACCAGAAA
TACGTTGACGAGCAATCGAAGAAGGAAATCAAAGATCTGTTGGTGAGGTATGATCGGACCCTACTTGTTGCTGATCCTCGTCGTTGTGAGCCTAAGAAAT
TTGGAGGTCGTGGTGCTCGTGCTCGTTTTCAGAAGTCGTATCGTTAG
ATGGCATACCGTAGAGCCCTGTCCTCTCTCATCAGGGGTGCCAAAACCGTCAGATCTCAACCGTCGAGCCTCATCAATAGAGGACCAGAGCTTTACAGGC
CGATATCATCTTCTTCGGGCCTTCTTCTCGACAAAGTTGCACAGTATGCGACATCGGCCGCTGCAACTTCGTCGCCTCCACCCCCTGTAGCAACTCCTCC
CGGTATTGGTAAAGATGGACCTCTTGGTAAGATCACTGATGAGTTCACAGGGGCTGGAGCCATTGGGAAGGTCTGTCAGGTGATTGGAGCAGTGGTGGAT
GTGAGGTTTGATGAGGGGTTGCCTCCGATCTTGACTGCATTGGAGGTTTTGGATAACTCCATAAGGTTGGTTTTGGAGGTGGCTCAGCATTTGGGGGAGA
AAATGGTGAGGACCATTGCTATGGATGGGACTGAAGGGCTTGTCAGGGGCCAGAGGGTGCTCAACACTGGTTCTCCCATCAAGGTACCAGTGGGTAGGGC
TACACTTGGTCGCATTATCAATGTCATTGGGGAACCCATTGACGAAAGGGGTGAAATAAAGACCGATCACTATTTGCCTATCCATCGTGAAGCTCCTTCA
TTTGTTGAACAAGCAACTGAGCAAGAGATTCTTGTTACTGGTATCAAGGTCGTCGACTTGTTGGCACCTTACCAGCGTGGTGGAAAGATTGGGCTCTTCG
GTGGTGCTGGTGTTGGCAAAACTGTGCTTATTATGGAGCTGATTAACAATGTCGCAAAGGCTCATGGTGGTTTTTCTGTCTTTGCTGGTGTTGGGGAACG
TACTCGGGAGGGTAACGATCTGTACAGGGAAATGATTGAGAGTGGTGTCATCAAGCTAGGTGAAAAACAGGCTGAGAGCAAGTGTGCTCTTGTGTACGGA
CAAATGAATGAGCCGCCTGGTGCTCGTGCTCGTGTGGGGCTGACCGGGCTCACTGTAGCCGAACATTTCAGAGATGCTGAAGGCCAAGATGTGCTTCTCT
TCATTGACAACATTTTCCGTTTCACCCAAGCAAACTCTGAAGTGTCTGCTCTGCTTGGGCGTATCCCATCTGCTGTGGGTTATCAACCAACCTTAGCCAC
TGATCTTGGAGGCTTGCAAGAGCGTATCACAACAACAAAGAAGGGTTCGATCACTTCTGTGCAGGCTATTTACGTGCCTGCTGATGATTTGACTGATCCT
GCCCCTGCCACCACCTTTGCTCATCTTGATGCCACCACTGTGTTATCTCGTCAGATTTCAGAACTTGGTATCTACCCTGCTGTGGATCCCCTTGATTCTA
CGTCGCGTATGCTTTCCCCTCACATTCTTGGGCAGGATCACTACAACACTGCTCGTGGTGTCCAGAAGGTTCTTCAAAACTATAAGAATCTTCAGGATAT
TATTGCCATCCTGGGTATGGACGAGCTAAGTGAAGATGACAAGTTGACAGTGGCTCGTGCTAGGAAAATCCAGAGGTTCCTGAGTCAGCCTTTCCATGTT
GCTGAGGTTTTCACGGGTGCTCCAGGAAAATATGTGGAATTGAAGGAGAGCATTGTCAGCTTCCAGGGTGTATTGGATGGAAAGTATGATGATCTTCCCG
AGCAGTCATTCTACATGGTTGGTGGGATCGAAGAGGTCATTGCCAAAGCCGAGAAGATTGCCAAGGAGTCGGCCACCACCTGA
ATGCCTTCAAGGCCTGAGAAACAGGCTCCTCCAGAGTTCTTCTATGATGAAACTGAAGCTCGAAAGTATACGACTTCATCTCGTATAATCGAAATCCAGG
CTAAGCTTTCTGAAAGGGCATTGGAGCTTCTTGCCTTGCCTGATGATGGAGTTTCTAGACTTTTGCTTGATATTGGTTGTGGATCTGGGCTTAGTGGAGA
AACACTCTCAGAGAATGGACATCAATGGATTGGGCTGGATATATCACATTCCATGCTTGATATTGCATTGGAGCGTGAAGCAGAGGGTGACCTCATACTT
TCAGATATTGGCCAGGGCTTGGGCCTCCGTCCTGGATGTATTGATGGGGCAATTAGTATCTCAGCTGTTCAGTGGTTATGCAATGCTGATAAGAGTTCTA
ATGACCCCAAGCTGAGATTGAGGGCTTTCTTTGGATCATTGTATAGATGTTTAGCAAGGGGAGCAAGAGTTGTGTTACAACTTTATCCGGAAAATCATGC
TCAACTTGAGATGATCACTTCTGCTGCAATGAGATCTGGATTTTCGGGTGGTTTGGTTGTTGATTACCCACACAGTACCCGAGCAAAGAAGTATTTTCTC
TGCCTCATATGTGGTCCCCCAAATTTAAGCACAACCCTTCCAAGGGCCAAAGGTGAAGATGGGGGGAGTTGCTCAGAAGAGAGTGACAGCGATGGAGAAA
ATCAAACAGTACGAGTTCAAGAGAGGCAGCGTCCTAGGAAGAAGCAAAAGATGCTTCAATTAACGCAAGTTCATTTACGCACTGAACCCTTCCTTGGCAA
TGGTTATGGTGAGCCAAAGGTGTATATTTATTCCTCTATTGCAGTATCAATTTTGGAAATCAATCTGAGGTGGATGGACCTTCACACCACTTGGGTATGG
TGCTCAAATCTCTCTACTTTGGATCCCATGACAGGTTTTTGGGGTTTCTGCAGTTGA
ATTTTGGAAATGAATCTGGAGGATGATGCTGAAGAGGAAGGTGCGAATGTTGATCTAGATTCCCAAGGGAAGGGAAAGAGTGTTGTGCTTAAAACATCTA
CACGTAAGACCATATTTTTGCCTTTTGTTGTGCTCGTAGATCCTGACAAGCTTAAACCTGGTGATTTAGTTGGGGTGGATAAAGACAATTATGTGATATT
AGATACTTTGCCATCTGAGTATGATTCGTGTGTTAAGGCCATGGAAGTTGATGAAAAGCCTACTGAAGATTCCATTGACTTAGGAGGTCTTGAGAAGCAG
ATTCAAGAATTTGTTGAGACTATTGTTTTACCTATAACCCACAAGGAAAGGTTTCAGAAATTAGGAGTTCGTCCACCCAAAGGAGTTCTTCTCTATGGAC
CTCCTGGAACAGGCAAAACTCTAATGGCACGTGCATGTGCTGCTCAGATCAATGCTACTTTTTTGAAGCTTGCAGGTCCCCAATTAGTTCAGTGGATTGA
TTTGAAGGGCTTATGGGACTTTTGGAATTGGCAAAATTTGAGGGTCTTGCATAATTGA
ATGCCTTCTCTCCCTTCCTCTGGTAAAATCCTGCAACTGGAGCTCGAGAACTTCAAATCCTACAAAGGAAACCAGACTATTGGTCCCTTTCGAGACTTCA
CAGCCATTATTGGACCAAATGGAGCAGGAAAATCGAATCTCATGGATGCTATAAGCTTTGTTCTAGGGATTCGATCTGCTCAATTAAGAGGAGCTCATTT
GAGGGACTTAATTTATGCCAGCGATGATAGAGATAAGGAACAGAAAGGGAGAAGAGCCTCGGTGAAACTCGTTTACGAGACAGCTGGGGGTGAGCATGTC
AAATTTTCGAGAACAATTACTGGGGCTGGAAGTAGTGATTATCGAATCGATGATAGAATTGTGAATTGGGATGAGTATAGTGGTCGGCTGAAGTCCTTTG
GAATTCTTGTGAAGGCTCGGAATTTCTTGGTTTTTCAGGGTGATGTTGAGTCTATTGCCTCAAAGAATCCTAAGGAACTCACAGCCCTCCTTGAGCAAAT
TTCTGGTTCTGATGAACTTAAGAAAGATTATGAGAGCCTGGAAGAGCAGAAGGAAAGGGCTGTAGAGAAATCTGCATACATTTATCAAAAGAAGAGGACT
GTTGTCTTGGAAAGGAAACAAAAGAAAGAGCAAAAAAAAGAAGCTGAGGAGCACCTTCGCTTGCAAGAGGAGTTGAAATCTCGGAAAAAAGAGTACCGTT
TGTGGCAAGTATTTAACATTGAAAATGATATGGAGAAGACTGAACATGAGCTTGAAGATGACAATAGAAATCTTCTGGATCTGGTGAAGGTCCAGGAGAA
ATGTGAACATGATGTCAATGACAAAAAGAAAGAACATGCTGGGTACTTGAAAGAAGCTCTCTTGTGTGAAAAGAAGTTTGCAAAGAAGAAAGCTGATCTT
GATAAAAAGCAACCAGAACTTCTAAAACTGAAGGAGGAGATATCTCGAATCAACTCGAAAATTAAAAGCAGCAAGAAGGAATTGAACAAAAAGAGAGCAG
AGAAGGAGAAAAAATTGGAAGAAATTGAGAAACTAAAGAAAGATGAGCAGGATGTCCGCACATCTCTCAGTGAGTTAAATGGGCAAGGCCAAGATGTTGG
GGGAAGACTCCAACTAGCAGACAACCAATTGAAGGAATACCATAGAATTAAAGAAGAAGCTGGCATGAAGACGGCAAAGTTGAGAGAGGAAAAAGAGGTA
TTTGATCGGCAGCAGCAAGTTGACACTGAATTACAAAAGAACTTGGAAGGGACTCTTCAACAACAGATGAGTCGGGAGCAAGAGCTCGCATCCCAAGAGG
AACAAATGGAAGCTAAACTGAAAAAGCTTATAGATTCACTTGGGAGAAACAATGAAGAGCTCAAACAAGTAAAAGTACAATTGAGTCAAATGCAAGAAGC
ACATCGAACATCGAAGTCAAGGTATGATCAGTTAAAGGCGAGGATTGATGAAGTTGAAACTGAATTACGTGAGCTGAAGGCTGACAGGTTTGAGAATGAG
CGGGATGCTAGGTTGTCAGAGGCTGTTGAGAGTCTCAAGCGTCTGTTCCCAGGTGTGCATGGTCGAATGACAGACCTTTGCAAGTCAAACCATAAGAAGT
TTCACCTTGCAATTACTGTTGCTATGGGAAGATTCATGGATGCGATAGTTGTTGAAGATGACTATACAGGAAAGGAATTATTTGAAGGAACAACGACTTC
CACCCCAGACATTCATCCCTTTGCAATCAATCCGTGTAAAACCTGTACTTGA
>crei
CGAAAAGAAAGGCTGCCAAAATGGCGACCCAGTCGGTGCAGACTTTCGGCCGCAAGAAGACCGCCGTCGCGGTGGCCTACTGCAAGCAGGGCAGCGGCCT
CATTAAGCTGAATGGCCAGCCCCTGGAGCTGGTGAAGCCCGAGGCTCTGCGCTTCAAGGTGTTTGAGCCCATCCTGGTGATTGGCCGCGCCAAGGTGAAG
AACCTGGACATCCGCCTGCGCGTCAAGGGCGGCGGCCACGTGTCGCAGATCTACGCTCTGCGCCAGGCCATCGCCAAGGCCGTGGTTGCCTTCTACCAGA
AGTACGTGGACGAGCAGAGCAAGCAGCAGATCAAGGACGCGCTCCTGCAGTTCGACAGGACGCTGCTGGTGGCTGACCCCCGCCGCTGCGAGCCCAAGAA
GTTCGGTGGTCGCGGTGCCCGCGCCCGCTTCCAGAAGTCGTACCGTTAAGCGGTACGACCGCATGCCACGTGGCAACTGCCGCCGTCGGGGGCGTGGGTC
TGGGCGGCGCAGCGGTGCGTGGCTCGCCCCAGCTGGTTCCTCAGCCGGGGCGCTTTCGGAGGTGTCGTCGTGGTGTTGTCGTGGCTGGCGCGCCGGCCGC
CGGGCGTCGGTGGCGACGGCGGCGGCTAGTCGCTGGCGGCGCGCGGGGTGGCGCAGTCGTGGGCCCGCTTCGCAGCGGCTGGCGGCTGCGGCGGCGGCGC
GCGCGGCCCGCGGGGTACGGCGGGCGCCGGCGGTCGCCTGAGCCAGTGCGGCGTAGGGCGACGGCTCGGCTCGGCGCGTGTGCTTGGCGAGCCGGCCGGG
GAGGGAGAGGTTTAACGCGTCTGGACGAACCGCCGTCTAGTCCAGGTGTAACTCACTGGTGAAATAGCGTCAAGTGCCGCTGCAGCTTGTGGGTGCGAGT
CCACCAGAGTGACCTATGCCTCGAGCAGCTCTCCTCGACCGCGCTCAGCGTTCGTCGCATTTTGCTGCACTTCCACGACACAGTTGCGCAGACCTGCGGC
ACCGACAGCAAAAGGTGCGGCTGTCTAGCATGGAAGCCAGCAGCGCATTACGCCAGGGGGACCACGGGTTTCCCCCTACTTGGTCTCCTGCTCAGCGGCG
GTGCTAGGCGTTCCGTAGTGACTGTGTCAAGGAAAGCCGGCGGTGCGGAGAGCTGCATGGAGCCGGACGCACCGTGTGTCATGTATGGGTGGCGGCACCG
AAGTGGTTTAGACGGCATACATACTACGGTACTGTACTAGCCCAGGGTCGAACACACAAAACACGATGATGACTCCCCGGGCGTGCATAGTGACAGGCAT
GCGTGGCGTTGACAGCAACTGGTGTGTGTGGTTACATTCGACAGCCAGTGTCCCTACCCTGCCGTTGCAAATTGTTTGCCATCTGCTGGGGTCTGAGCGT
CAGCTGCAACCCTACGGGACCCCTGAACCTGCCTAAACAATGTCCCATCGCACAGCCAGTGTACCTGAAGCGCACGAGCCGCGCACAAAGACACCCACTT
GATCAAACGTTTCTCCCCCACAATGCGGCGCATGAACACAGTCATGGCATCCGATGGAGCATTGAGGCCACCTCTGGAAGTCTTTTGTAGTGTAGGTTGG
CAGCACTGGGGCAGCAGGACACAATGGTGGGGCACACCACCCAGGGGACAGGCGCTACCGCTTCTGAGGGTGCACGCGAGGGGTTACTGGATGCCCAGCC
ACCAGGATAACTGCGTCTCTACCTCAAACGCCCGTCAGTATGTAAAGTCAGCACCTAGCTCGTTGCAATAGCACCTAGCTTGTGGCAGTAGCCTCGGGAC
AGAGACGAACGCCAGACATGTCGGCGCCAGACATGTCCACTCGCGAGCGCGTTTGTTCGCTCATCTATACCAAGCAAGTGATTCGCTTTCAGTAGGGAGC
ATTTAACCTTCAGAAACGATACCTTTTCAAAAAGCTTCCGAAGAAAGCTCACCGGGCCCCCGGAATGGTATGAATGAACCTGTATGCCCACCGTGCATGA
TTAGCTCTGCAGTGAGCTCTGCTTTGTATATGATACTATTGAA
TTGTGCCCCTCGCAAGGGAGCCGAACCCAAAGCACAGAGCGCCGCGACAAGACATGCCAATGCAAATCACTCTCGGTGCACGCTCGACCCTGCACCAGCA
CGTGCCATGGGAGTTTTGTGCTTCAATAAGTAATATTGAATGATAAGACGCGGAGAATGAGGGGGAAGAAGAGGCCATGCACGAGATGGTGCCCATGCAA
AATGAGTCTTCTCTCGCTCTGGCTTTGACAGCAGCGCCCTCATAGATTGTTCTGTATAGATTTTGGGGTTGGGCACCGTGATAGTCGGGGCCTTTACCAG
GATGTTGTCCAGCGTGCGCCTCGCTGCCCTTCGGGCGGGCAAGACCAACAGCGTCTTCCAGGCCGTCCGCGCCTTCGCTGCGGAGCCTGCTGCTGCGGCG
ACTACTGATGCCGGCTTCGTCAGCCAGGTCATCGGCCCTGTGGTGGATGTGCGTTTCGATGGCGAGCTGCCTTCGATTCTGAGTGCTCTGGAGGTGCAGG
GGCACAATGTGCGCCTGGTGCTGGAGGTGGCGCAGCACATGGGTGACAACACCGTGCGCTGCGTGGCCATGGACAGCACTGATGGTCTGGTGCGTGGCCA
GAAGGTGGTGAACACCGGCTCCCCCATCAAGGTGCCGGTGGGCCGTGGCACTCTGGGCCGCATCATGAACGTGATTGGCGAGCCCGTCGACGAGCAGGGC
CCCATCGAATGCTCGGAGGTGTGGTCCATCCACCGCGAGGCTCCTGAGTTCACTGAGCAGAGCACTGAGCAGGAGATCCTGGTGACCGGCATCAAGGTCG
TGGACCTGCTGGCTCCCTACCAGCGTGGTGGCAAGATCGGTCTGTTCGGTGGTGCCGGTGTGGGCAAGACCGTGCTGATTATGGAGCTCATCAACAACGT
CGCTAAGGCGCACGGTGGTTTCTCCGTGTTCGCCGGTGTCGGCGAGCGCACCCGTGAGGGCAACGACCTGTACCGTGAGATGATTGAGTCGGGTGTGATT
AAGCTTGGCGACAAGCGCGGCGAGTCCAAGTGCACCCTGGTGTACGGCCAGATGAACGAGCCCCCGGGTGCCCGTGCCCGTGTGGCCCTGACGGGTCTGA
CTGTGGCCGAGTACTTCCGTGACGTGGAGGGCCAGGACGTGCTGCTGTTCGTGGACAACATCTTCCGCTTCACGCAGGCGAACTCGGAGGTGTCTGCCCT
GCTGGGCCGCATCCCCTCGGCCGTGGGTTACCAGCCCACCCTGGCCACCGATCTGGGTGGCCTGCAGGAGCGCATTACCACCACCACCAAGGGTTCCATT
ACCTCGGTGCAGGCTGTGTACGTGCCCGCCGATGACCTGACGGATCCCGCCCCCGCAACCACCTTCGCGCATCTGGACGCCACCACCGTGCTGTCCCGCT
CGATTGCCGAGCTGGGCATCTACCCCGCCGTGGACCCCCTGGACTCCACCAGCCGCATGCTCAACCCCAACATCATTGGCGCCGAGCACTACAACATCGC
CCGTGGTGTGCAGAAGGTGCTGCAGGACTACAAGAACCTGCAGGATATTATTGCCATTCTGGGTATGGATGAGCTGAGCGAGGAGGACAAGCTGACCGTG
GCGCGCGCCCGCAAGATCCAGCGTTTCCTGTCGCAGCCCTTCCAGGTGGCCGAGGTGTTCACCGGCACCCCCGGCAAGTACGTGGACCTGAAGGACACCA
TCTCCGCCTTCACCGGCATCCTGCAGGGCAAGTACGACGACCTTCCTGAGATGGCTTTCTACATGGTGGGCGGCATCCACGAGGTGGTGGAGAAGGCCGA
CAAGCTGGCCAAGGACGTGGCGGCCCGCAAGGACGAGAGCAAGAAGGCCAAGTCGTCTGAGGCGCTGAAGGACGTGCCCAGCCTGGAGAAGATGGCGGGC
GAGATCAAGGACGAGGTGATTGACGCCGACGACAGCCTGGAGGAGGACTTCAAGGCGGAGGCCATCAGCAGCGAGAACATGGTGCTGAACGAGAAGGGCG
AGAAGGTGCCCCTGCCCAAGAAGTAAGCGGCTAGGCCGCAGCAGCAGGAGTGCAGATAGCCTTAGGGAGCATTCGGTGACGCCCGCTCGCCGCTCCGGCG
GCGGCTGTAGCAGTAATAATTCGTTGCTGACAGAGCCCGGGAGTTGAGGGGGCGGCAGCTGGGCGCGCAGCCTTGCGCAGTGGCTGCGCCATGGTCGCGT
CGCGTGTCTGGGTCTGCCTGTGTGCCTGGCGCACAGCAGCCCGGGCTGTTCGGAAGCGCACGGCCGGGTGCATCACGCTGGTGCACGGCTTAGGAACGCG
GGCGTCGCGGGGCTGTGCGCGGATGCGAATTTGGCTCTGTGCTCATTATCGTTCAGAGTGTGTTTGGTCTAGTGCACGCCCGAGCAGTGGGGTGGGTCCG
CGGCTAGTGCGGAGGCAGGGCGGTGCAGGCTTATAAGGCTTAGGAACCTGACCGGATTGGGACTCGAGGGATCAGTCAGTCAAAGATGTCACCATGGTGC
GGCCTGAGTCGTCAGGCCGGCTTGGTTGGCGAGGATCAGGGCGGGTGCGCAGGGAGTTGTTGATGGCGGGGCCATGTCAGCATGGGACCCCCTGGCGGCG
GACCTCCACTCCTAGCAGAGCGAGACAGTAGATGTGTGTCTATGCGGTGTCAAGGGTACGGACTGCGACAAGGTATGTGTGTGCGCGTGCGTAGGCAGGC
AGAAGAGTTGGGGGCAGCAGCTCCTGTAAGGACATCACCCA
CTAGTGTAAGTAGCATAACGCTGTAATCAAGGCCCCAGCGGGGCAGTGGACTTTCCTTCTTACGCCTGACGCTGCTCCTTTCCGGCCCGAAATGAGCGCA
CAAAAGTCAGCAGGCGTCAAGGAGGTGCTTCCAAAAGCCGGCCTCGTCGTTAGCGAGAAGGGCAACCTGACCGAAATTCTGTGCAAGCCCAAGCTCATGC
CGCTCAAGTCAATTACTCTGCAAAAGCTAGAGGAGATGGAAGCCAAGATTTCTGAGGTTACAAAACAGCAGCAGGCAGCACGCCTGGGCACAGCTGCTGG
ACCTCGGCCGGGCACTGCGACCAACAACGGCGGCTTTACTGCCTTCTAGATAATTAGTTCTAGTCGCTTCTCTAGCAGACTTGGCGCCTGTGCTGGTCCA
CGCCAGCAGCCGATAGCCGAAGGGCCCTGGGCGGCGCAACTTACGTCGAGCGGTCGCAGCCATGGGGAAAGGCGAACGCCCGGAGCATATGGCTCCGCCC
GACATCTTCTACAACGAGGACGAGGCGCGCAAATACACAACAAACAGCCGCATGATCAACATCCAGTCCACACTCACGGAGCGAGCGCTGGAGCTGCTGG
CGCTGCCACAGGACGGCCTACCTCGTCTGCTTCTTGACCTGGGCTGCGGCAGCGGCCTGAGCGGCGAGGCGCTGAGCGAGGCGGGCCAGGTGTGGGTGGG
GCTGGACATCAGCGCGGCCATGCTGGATGTGGCGCACGAGCGGGAGGTGGAGGGCGACCTGGTGCTGGGCGACCTGGGCCACGGCCTGCCGCTGCGGCCC
GGCTCCTTCGACGGCGCCATCTCCATCTCGGCCGTGCAGTGGCTGTGCAACGCGGACCGGGCGGGGCACGACCCGCGCAAGCGCATGAAGCGCTTCTTTG
AGACGCTGTACATGTCGCTGCGGCGGGGCGCGCGGGCGGTGCTGCAGATCTACCCCGAGAACCACAAGCAGGCGGAGATGCTGGTGGCAGCGGCAATGAA
GGTGGGCTTCTCCGGCGGCCTGGTGGTGGACTACCCGCACTCCACCCGCGCCAAGAAGTACTTCCTGGTGCTCATGGTGGGCACGTCCATCTCGGTGCCC
ACCGCCAAGGGCCTGGACGGCGGTGAGCCTGAGGACGAGGAGGAGGAGGCGGCGGCGGAGCACGTGCAGGTGGCGGGCCGCGACCGCAACAAGCGGCGGC
GCACGGGCAGCGGCAAGGGCGACGGCAAGGGGCGGGAGTGGGTGCTGCGCAAGAAGGAGCAGATGCGCAAGAAGGGCTACGACATAGCGCCCGACTCCAA
GTACACAGCGCGCAAGCGGAAGCGCGTCGTCTGAGGCGCAAGCGGAGGCGGATTGTGCGAGGCGGCGGGCCCAGTGGCCGCAACCTCCTGCACCGTGCCT
GGGAGGGCTTGGGTTGTGTGCGGTGGAGTGAAAGCAGGGGCACAGGGGCGGCGGGCGGCAGAGTATCTGGAGGGGCGTGGGCAGGCCGTGGAGTTGGTGC
AAAGCAAGGGCTGCGGATGGCATGGCGGGTGCCAGGCCACAGGATCTGCATGCAGCAGCTGCAGCGAGTGTGTGTGTGTCGTGCAGCGGATTTTGCAAGT
TGCAAGGGCTTCACACGCGCACATGCAGCGGCAGCCGACATGGGGTTTGCAACATGGGCGCTGGAGAAGGCCCTCCAGTGCCGGGCCGCTGCGGCATGCG
GCGGGGCTCTGGAGCGCACACAGGCAGCAGCTTGCGGGGGCCAGGAGCCGAGCAGTGGTTGCACGCCTAGTGTGTGCGCATGGCTGGCTGGGTGTGGCAG
ATACATCGGTGACCGGTATGCTTCTCTGGTATGCCTCTCTGGTAGGGAATGGTTGGTACGGCATGGCTGCGGACGTTGTCAGTGCCAACTGAGTAACGGA
GCGGGTGTTGGTGGGATGCTGCTCCGAGGTAAGGGTATGTGGTGGGAGCTACCTTACCCGCAGCAGCGGGTTACGGGTGGTGGGCACGGCGCGGGACACG
AGCATGGCGTGGAGAGGCGGGTATCAAGGAGTTGATAAACTCCAGACGTTGAATGCTTGGTTGGCAGGCCGGCGGCACCGCCACACAGCCCAACGGTCGC
ACCAGCCAGTCCCAAGGGTCGTATCTTGTTTTTGGAGCACCGGCCAGCGCACACCTGCTGTGCTTGGGACTTGCAGCGGCCCATGAAAGCCATCAGCCCG
CTAGGGCCTTCTCTTGTTAAACTACATCGTCCGGAGGGCGGGCCACGCACCAACGCTGCCGCGGAGGCGCTCGGCGTGGACGGGGACGAGCTCGGCGACC
TTCTTTTTACGCTGTCGGAACTATCGGAGGGGCAGCTCGAATTCTTTCCGATAGGCGCTGACAATAAGGCAATCGTTGCGTTGCGCAGTCTGCGAGAGGA
CCCAAACGCAACGATTGCCTTATTGCCAGCGGCTATTGGAAAGAATTTGAGCTGCTCCTCCGATAGTTTCGACAGCGTAAAGAGAAGGTCGCCGAGCTCG
TCCCCGTCCACGCCGAGCGCCTCCGCGGCAGCGTTGAAAGCCGCCACCTCCTTTTTGCTAACCATATCCGCTCATGCAGTGGCACAACAAGGTCTGAAGG
ACGGCTACACGCTGTATGCCGAGGCAGGGTTTACATGCTACCGAAGTTGCGGAAAGCGGTGTTGCCACGCTGAAACCGATTCACAGAGTTGAGTGCTTGG
GCTCAGTCCAGCAATGCGCAAATGTGTATCTGTCTTAGCGCTGTCTGACGGGGGATGGGGACTGCGGCATCATTTGCGGGGCAAGCAACCACAATTCATG
GTGCACTGCATGCCTTGCTCTTGTCGGTGCCACTTACCGGTGCTCTCTTGTTACCTTCCGCGCGCAGGCCGCGTGCGCTAGACTCAGACTGTTCCGCAAG
CATGCACGGCGGGCCAGTACAGTGGCGGTTGCGGATGTCACGCGATACCGTGTGCTGGCGTACGTGTGATGTGCCCCGCTGGTTCTAAGGTCTGCTTGTA
GCCCCTTGCTCGACGGCTAGCAGAACAGGCGGGTCGTGTGGCTCAGGATGCCTCTCACGAATATTGTTTACACGTTGTAGCCTTCAGGCGGCTTCTGTGT
ACCGGTGGTCAGATGTTCTGGAATCGCTAAGTGATAAATCAAGTAGCTCAAACTCTGACAAGCAGGTTTGAGCTACGGCGCCCACTAAAAGGGCCGCCAG
CGCGCCCATGCCGCAGCTCCGGGGCGCTACTGGTCTGACTTACGAACGTCCACGAACCCACACGATGCTCAGCAACGCCGTGTTGCTAACAGGTAATTCA
TCCCATCTTGTACCGTTCTAACACGGAAACGCGTGGAGATACGCCCAGATCACGCAACACGCTGACGTGGGAAGTGACACACGTCCTAACACAAAACCCG
CCACCTAGTTCCGAGTCAGGGTTTTGTCCCTCTAAGTGGCAATCATGCTAAGTAATGCGTGCAAACACCATGCGGTGACACGGCATGCACGGTCACACGC
CAGGGCGTGACAGCTGTCACGCGATACCGTGTGCTGGCGTATGTATTATAAGTTTTTTTATAATATCGTGTGACAGGTGTCACGTGATTTCGGGGTTTTT
TTTCTTTTTTTTCCACATATGACAGCTGTCATGTGATGGCGAGGTGCTGCTTTGACGGATTGTGAAAGTGGGGAGGGGGGAGGGGTGTGTGTGTGTGTTG
CAATGCGAGTGAATGTGGCGAGGGATAGTGCCGGGAAAGCTGCCTAACGTCAGGGTTAGGGTTGTTGCGGCTGTCGGGTTTAGGGCAGTGTCAGTGCGGA
ACGGGTGCCTCCCGGGCTCCGGACGGTAGAAGGCTGAGTCATTGCTAGTCTTATTCTGCGGTGCTTTACGGGTGTGAAGTACGTTGGAACGCAGTTTGTA
GATGCCGTTATGACGTGGCTAAGGATTTGCGTATCCGGATGAGGCGATTCCCCCTTGGGGCGCCGTTGTTTGTGTGGTCACTAGCTCGAGACGACTTGTT
CTGTCTCGAGCTCTCTGGTACGGCTTGCTGGTTAGCGATTTCACAGACAGAACCCCGCTGCGCCTATACACGGCCGGTGGTAATACGCGTTTAACCAACA
AGAGGTC
GGGGTCGTCGCATGCGCGTCGCTCGGGCTTCCCAGCAGCGCGGGTTCACCACACGCGACGGCCTGTCACATACTTCGTTTTAAATGCCGAAGGCTTGACT
TACCACACGCACAAAGATGGCGACGATAGACAAAGAAATTTTCGACGACTCAACTGAGGATGCCCTGCCTGAGGAGTTTTCCTATATGAGCGCAGAGGCT
ATCCAGCAACGTGTGCGTCTCCTGGACAATGAGCTTCGCGTGCTAAAAGACGAGAGCACCCGCCTTACGTTAGAGCAGGACGGTCTGAAGGAGAAAATTA
AGGAGAACAAGGAGAAGATCAAGCTCAACAACCAGCTGCCATACCTGGTTGGCAATATCGTGGAGGTGCTGGACATTAAGCCAGAGGAGGACGAGGAGGA
GGACGGGTCGACTGTAGATCTCGATGCTCAGCGTCGCGGGAAGTGCGTGGTGCTCAAAACCTCAACCCGCCAAACCATTTTCCTGCCGGTAGTTGGCCTG
GTGGACGCAAACACGCTCAAGCCGGGTGACCTGGTGGGCGTGAACAAGGACAGCTACCTGGTGCTGGACACCCTCCCTGCGGAGTATGACTCCCGCGTGA
AGGCGATGGAGGTGGACGAGAAGCCCACGGAGGACTACTCGGACGTGGGCGGTCTGGATAAGCAGATTCAGGAGCTGGTGGAGGCTATCGTGCTGCCCAT
CCAGCACAAGGACCGCTTCACCAAGCTGGGCATCAAGCCGCCAAAGGGCGTGCTGTGCTACGGCCCTCCCGGCACGGGCAAGACGCTCATTGCGCGTGCG
GTGGCGGCGCAGACAAATGCCACCTTCCTGAAGCTGGCGGGGCCACAGCTGGTCCAGATGTTCATCGGTGACGGCGCCAAGATGGTGCGCGACGCGTTCG
CGCTGGCCAAGGAGAAGTCGCCCTGCATCATCTTCATTGATGAGATTGACGCCATCGGCACCAAGCGCTTCGACTCCGAGCTGTCGGGAGACCGCGAGGT
CCAGCGCACCATGCTGGAGCTGCTCAACCAGCTGGACGGCTTCAGCAGCAACGACGACGTCAAGGTCATTGCCGCCACCAACCGCGCCGATATCCTGGAC
CCCGCGCTCATGCGCTCCGGCCGCCTGGACCGCAAGATCGAGTTCCCGCACCCCAACGAGGACGCGCGCGCCAAGATCCTGCGCATCCACAGTCGCAAGA
TGAACGTGGCGGCGGACGTTAACTATGAGGAGCTGGGGCGGAGCACGGACGACTTCAACGCGGCGCAGCTGAAGGCCGTGTGCGTGGAGGCGGGCATGCT
GGCGCTGCGGCGAGACGGCACGGAGGTGACGCACGAGGACTTTGTGGAGGGCATCACGCAGGTGCAGGCCAAGAAGAAGGCCAACCTGCAGTACTATGCG
TAAAGCGGCGTCGGCGGAGGTGGAGGAGGCGGCGGAGGCGGGCAGACGGGGAGGACGGTTTGTGGGCGTGTACGAGGTGGCGGATGGAGGAGATGGACTG
ATGGCGGCATGGGGGTATACATGTGTTAGGATGTAGGGATATGCCGCCAGTAGGACAGGGATTTGTAGAGCAGGTACAGGTGGTTGGCTTGCAGGTTGGC
AGCTAGTGATGTCTGCAGGTCGCATGGGGATAGCGGGTAGACGTGGTAACGCATGCGTCAGTCCATGAACCGCAGCCAAGTTGACAGTGTGGCGTAACGG
TGTGTCGAAGGTCGCGGATTCCTCCAGGGAACAAGACCTGTTATTGCGCGGCCGACCCGCTGTATGTCGATATTCACTGGACCTCGATTGACACGACATT
GACTCAATGAACCTTACACAACCAAGGGCTCACCCGCAATGGAGGGCGATACCCCGAGCATGAGGAACTGTAAACTGCACCC
GATTATCAATACTCACTCACTAGGCGCAGCGACGCGCTTCTGGTGTGAAGGAATTGCCATTTCGACCTGCATTTCGACCTTCGATCTTACCGCTGTTTCA
ACTTCACGCTACAACTTTAACTTGTTACATGGTCATTAAGCATATGCGGCGATGGCGCGTGACCGCGAGGACCGACGGAGGCGGAAAGCGCTGGACGATC
CAAATGAGTTGGATGGTCCCCAGTACTCGAGTTGCTCGAGGCATGATATAATACTGTCGGGCTCGGACCTGCCGCGCAAGCGCGTCCGCCGCGCCCCCGT
GGCCCCGGCGCGCGCTCCGCCCCCGCGCAGCAGCCGCTCACGCTCGCCGGGCCTCGCGCTGCTGCTGCTGCGGCACCCACTGCCCAGCACGCAACAAACC
ACCTGCCGCAGCAACCGCAGCTGCCGCAGCTGCCGCAACAAACGCGGCCTCAGCCCCAGCAACCCCATCAGCGGGCCAGTAATGGTGCAGCTGCCCAGCT
GTCGCTTCGTGGGAATTCTTGGCGCCAACGGCAGCGGCAAGAGCAATCTGATGGAAGCAATCATGTTCGCGGCGGGCTGCCCGGCGACCGCGCTGCGGGT
GCGCACGCTGCGGGAGCTGGCGAGCAGCGATGCGGCGGATGCGCCTTGTGAAGTGGAGCTGGTCATCCGCCGGCGTGCCGCCGCCGCGCCGCCGCAACCT
CCCGGTCGCCCTGCCGGCGGCGGCGGCGGCAGTAGGAAGGCATCCGCCGCCGCCGCCGCCGCCGCCGGTGCGGAGGAGCACGTGGTGCGAGCCTATCTAC
TACCGGCGGGCGCGGCGGCGCCGCCGTCAGCAGCGGGCGAGGACAGGGCTGGCGGCGGCGGTGGCGGTGGCGGTGCGGTCCGCAGCTTCCAGATTGACGG
GCGCAACAAGACGGCGGCGCAGGTTAAGGAGTTCCTGGCGGCTCGTGGGTTGGGCCTGGATGGGGAGGGGCTCACGGGCGGCTCTGGCGGCAGCGGCGGC
GGCGGCTGCTCGCTGCGTGTGATCCGGCAGGCGGCTGTCACCGCGCTGGCAGACCGCAACGACCCTGAGGCCCTGTCCGGCTTCATCTCCGCCGCCAGCG
GTCTGGCGGCGTGGCGGCTGGAGGCGGCGCGCGGGCGGCAGGAGGTGGGGGCCACACGCGCCGCACTGCGCGACATCGCAGGCAACCTGGACAAACTGCA
AGCGGCGGTGCGCGAGGACGAGTCGCGCCTGGCCGCCACCACCCGGCTGCGGCAGCTGGAGGCGCAGCTGGCGGCGGCGGGCGGGCAGCTGAGGGACGGA
CTGGCGGGCTGGGCGGAGGCGCTGCAGGCGGAGGCGGAGCGTGGCGAGCGCCTACAGCGCGAAAGCAAGGCGGCCCTGCAGGAGGTGGCCAGGGACAGAG
AGGCGGCGGAGGCGGACCGGGGCCGGTGTGCTGCGGAGCTGGCGGCAATGGAGGCGCCGCCCGCTGCCACGGCGGCAGCGGGGGCAGCAACAGGCGCAAC
GGGAGAGCAGGCGGGAGACGGGGGTGATGCGGTGACGGGGGGCAGGGGGCGTGGCAAGTATGCGAGACGGCCCGCGCGCAAGGCGGCGGGTCGTGGCAGC
GGCTGCGGTGGCCACGAGGCACAGGCGGCGGCAGGAGGTGCGGCAGTAGCAGCGGCAGTAGCAGTAGCAGCTGATGGAGCAGCAGCTGGGCCGTCGCCGC
TCGCCTCATGGGCGGACCTGGAGCAGCAGGCGGCAGTAGCACGTGAGAAGCTGCGGCTGTGGCGGCAGCAGCTGGCGGCGGAGGCGCGGCAGCGGCAGGA
GCTGGCGGCGGCGGCGGTGGCGCACGCGTCAGTGGCTGCAGCCGCCGCAGCGGCGGCCGCAGAGGCGGCGCAAGCGAGCGAACAGCTGCGGCAGGCTGAG
GAGCAAACCGCGATGTTGCGGGAGGGGCAGGTGGCGGCGGAGGCGGCTGTAGCTCACGCGGCACAGCTGGCGACGGAGGCGGCGGAGGCGGAGGCTGTAG
CGGTCTCGCGCCGGCAGCGCCTGGCGACGGCGGAGGCAGCGCATCGGCGGGCTGTGGAGGCCGCGGCGGCTGTGTGGGCGGAGGCCCAGCTGGCGGGCGA
CGCGGCCCAGGCGGCGCAGGCGGAAACCGCTGCGGCGGCGGCGGCGGAGGCCGCCGCTTTGCGGGCGGAGGAGGCGGAGGAAGCTGTGGAGACCGTTCGG
CTCCAGCTCTCGGAGGTCACGCTGCGGGCCGACGCCCTGCGACGCGCGCTGCAGCTACCGCCGGCAGTGGGGCAGCCGGCGGTGGGCCGCGCCGACGCCG
ACGGCCGTGGCGGCGGCGGGGGTCTGAGTGGTGGAAGTGGCGGCATCCGCGCTCGGCGCCTTTACCAGTGCCTGGACCTGCTGCCTCAGCCGGCCGCAGC
TACTGCCGCAGCTACTGCCGCAGCTACAACTGCAGCTACTGCCGCAGCTACTGCCACGGGATCAGCACCAGCGCAGACAGGTCAAGCACTGCCCGCACAG
CCCGGAGACGACGATGGCGGTGGCGGTGGCGGTGGCGACTGGGCTGTGGCTCCGCGGCCGCCCTACCTTCGAGCTCTGGCAGTCATTGCTGGCGGCAGCC
TGCAGGTACTGCTGGTGGACAGGGCCGCAGACGCCGCCCGCCTCCTGCAAGACCCCGCAGCCATGGCGGCGGCGGTAGCCGCACACGGAGCCGGAGGCGA
CGACAGCGGCAGCAGTAGGGCAACACACCAGCACCATCACCAGCACCACCACCACCACCACCACCACCACCAGTTGCAGCAGCAGGCAGCTGTGCCAGGC
GGCGGCAGCAGGCGGCTGCGCATCTGGCCGCTGGACTCGCTGCGGCCGGGTGCGGACCTGAGCCAGCTGCAGCGGCGCGCGCAGCGCGAGCTGGCAGCGC
AAGGCCTGCAGTGCTGGCTGCCGCTCGACCTGCTGGCAGCAGCAGCAGCAGCAGAGCCCGGCCTCGGAGCCGGAGCCGGAGCCGGAGCCGGAGGATCCCT
GTCATCAGCAAGTGCGGCAGGCGCAGCGGCAGGCACGGGCCTGGGTGCCGCACTGCGGCGCGCCTTCGGGCGGCACCTGGTGGCGGGCGACGACGCGGCG
GCGGCGGCGTTGGCGGCGCCGCGCTGGCGCCTGTCGTCGGTCACACTGTCCGGCAACGTCAGCCACAGGGGGAGCCTGGCGGGAGGCTGGGACGGGGGGG
AGGGCGGCGGCGGCGGCATGGCGGCGGCGGGTGGTTGCAGCCTGCTGGAGCGGGTGTGGGAGCTGAGCGAGCTCCGGCGGCGGGAGGGGCGACTGCGGGC
CGGCCTGGCTCAGGCAGAGGCGCAACTGCGAGACGCGGAACGCGCGAGGGACAGTGCCGAGGCAGCCGCGGCCGAGGCATCTCAGACGGCACGGCAGGCA
GAGGCGGCGCGGCAGCGGCTGGGCGGTATGGATTTCCAGCTGCAAGTCACTGCGCGCGGGCTGGCGGCCGCACAGGCAGCCGTCGCCGACGCCGAGACAG
AGGCGGCGGAGCGCGCAGCGGCGGCCGCCGAGGCAGCGGTGGTAGCCACGGCTGCTGGTGCGAGCAGTGATAGTGCGCAGCAGCACGAGCTGTGTGATGG
CGAGGAGCCTGGGGGCTCAGGTGGCGGCGGTGGTGCGGCGAGGCAGCAACAAGCGCAGCGGAGGGCGGCGGCGGAGCTGGAGGCAGGTGTGGGCGCGCTG
AGGAGCCGCGTGGAGGCGCTTGAGGCGGCGGCGGTGGCGGCAGAGGAGGCGGCGGAGGAGGCGCAGGCGGTGCTGCTCGATGCGGAGGCGGCGGCTGCGG
GGCTGATGACGGAGGAGCAGGGTGCGGCTCGGCTGGAGGAGCTGCGAGCGGTGGCAGAGGACCTGGTGGCTCGTGCCAGCGCGGCCAAGGCGGCGGAGGA
GGAAGCCAAGAGGCGGCGCGCGGCACTGGCTGTCGCGGTGGAGGAGGCGTCGCAGCGGCTGACCGCGGCAGCGGCGCGCGGGCAGCAGCTGCAGGTGGAG
CTGGCCGCGAGCAAGAAGGCCACCACCGCGGCGCGGGAGGCTCTGCAGCGGGTCACGGCCGAGCTCACGGCCGCCCAGCACGAGTACGGCGGCGGCGGCG
GCGGCGGCGGCGGCGGCGATGGCGGCGGCGGCAATGGCGGCGGCAGTGGCGGAGGCGGCGGAGGCGGCGCTGGTGACGGTGGCGAGGCCGTAGGAAACGA
CGGTGGCGACGCCACGGCGCAAGGGAGGAGCGCTGCTGCGGACGCGGGTGCGGGGGCAGCAGGTGCGGTGGACGCGGAGGGCCGCTGCTCGGCGGAGGCG
TATGAGCGGCGTGTGGCGCAGCTGCGGACGCGGGTGCGGGCGCTGGGGTTGGAGCGGCAGCAGCTGGCGGGACGGCAGGTGCCGGCGGCCGAGATGCTGC
AGTTCCAGGAGCGGGTGCGCGGCGTGGCTGTGCTACTGGAGCGAGCGTCCGGGCTGGAGGCGGCGGCTGACGCGCTGAGGGAGGCGTTGGACGCGTCCGC
TGAGCAGGTGCTGCGTGTGAACGCCGCTGTGTTCCGGGCCGTGGGCCGCCGCTTCGCCGCGCTGTGCGGCCGCCTGCTGCCCGGCCTGCGGGTGGCGCTG
GAGGCGGCGGCGGGCGGCGGCAGAGGCGGCGATGGCGATAGCGGCGGAGCTGGAGGTGGAGCTGGAGCTGGGGGCGGAGGTGGGGGCGGGGCCTGTCCCA
GCCGTGGCGTGGTGATCCAGTTCTCGCGGCGGCAGCTGCAACAGCACGGCGGTGGAGGAGACGGGGCCGGTGCGGTGCAGGAGCAGGAGGAGTGGAGCCA
GGAGCTGGGTCAGCTGTCAGGCGGGCAGCGGACGCTGCTGTCGCTCGCGTTCCTGCTGTCCGTGGCGCTCACGGCGACGGGCGGAGGCGGCAATGGCGGG
GGCACAGCCGGCGGGGGGGCGGACGCCGCGGGAGCGGCGAAACCTGCTGCCCCCGGCACAAGCGGAGGCGGAGGCATATTCCTGCTAGATGAGGTGGACG
CGGCGCTGGATGAGCACAACCAGCAGGCGGCGGCGGGCCTGCTGCGGCACCTGGCGCACCGGCTGGGCGGCTCCGGCTGCCAGGTGCTGGTGGTGAGCCA
CAACGCCGCGTTCCAGAACCTGTGCGATGGCTTCATCCGAGTGACACGAGGCCGGGAGGGGTCGCAGGTGGAGGCAGTGACGGACCGCAGCGTGCGCCCT
GAGCCGGCACCTCCGTTGCCTGCCACCGCCGCTGCGATGGTTAACAGCGGCAGCCGGCACTCGACAGGTGGTGGAGAGCCCGCGAGCGGCCCTGCAGGAC
GTGGGTCAGCCACGCAGCAGAAGAGGGCAAGGCGCGTGTGACAGCATTTGAGCGCGCCCACATGTGCCCATCAGGGGTGCCCCTGGTGCCCATGTCTCCT
AGCCGAGCGTTTTCTGGGGGTTGGGGGTTGGGGTTTCAGGGGCTTGGGGTCCTGGAGCCGTGGCGAGGTTTTGTATTATCGAGTTGGAGAATAAGCGGGT
CGACACAGGGGTCGTATCTTCATTTCGGGGTGATGTCTAGCTCAGACAAAAACGGCCGGGTGGCCGCCGTCTTTTGTCTGGGAACACGGGGGGGGGGGGG
TTAGAAAGCTCAGGTTCTTACCCCATGCTCAAAGTTACAGAGCTTTACGAGAGCATTATGCACGTGCTTTCAGTTTTTGTAGGGGGTGGGTCGTCGTCCC
TGGGGGTAGGTCCGCCGGGTTTCGGGAGCCCATCCTGGCGGACTTCGGGAAGCGCCCCACAAGCAGGACTAGGGGCCAAACGCAGCACTACGAGGCTCAT
ATGTGCACGTTATGCCGTAATAAGCACAAAGAAAGCATGGAGGGCCAAGTTGCGCGTCGGGGCGTGGACATGTCGACACAGGTCCCCGAATTCGACACAT
GCGCACTGACACGGCTGGGCTCTCAAGCGCTGGTGCGCATGAATTCATGTCTAATAAGGCTGCCGATGCGCAGTGTCCATTCGTCACGCGGCAGAGAATT
GAGCGCGGGGTGGGTCGAGGGGATTTCCATGGGTAGGATCCCGCCTGTGATCGAAGTCTCAAAACAGGACCGCTGATGACACGGAGTGATAGTGCTCGTC
AAGAGGAGTCGATTGACACCACTTTGGTACTAAGTTGAGGGGTATTACCACTAAACAA
>esa
AATTTTATCGAATCTGTGCAATGCTTGGGAAGGAAGAAGACGGCAGTGGCGGTGACACACTGCAAGCGTGGGCCTGGTCTGATCAAGCTCAATGGTTCAC
CAATCGAGCTATTCCAGCCTGAGATCCTCCGGTTCAAGATTTTCGAGCCAGTCCTCCTCGGAAAACACCGTTTCGCCGGTGTCGACATGAGGATCCGTGT
CAAAGGTGGTGGTCACAGTTCTCAGGTCTACGCCATCCGTCACGTTCAGAGCATCGCCAAGGCTCTTGTTGTTTTCTACCAGAGGTACGTGGATGAGCAA
TCGAAGAAGGAGATCAAGGATATCCTGGTCAGGAGGTGCGAGCCGAAGAAGTTCGGTGGTCGTGGTGCTCGTGCTCGTTTCCAGAAGAGTTACCGTTAA
ATGGAGCTTAGATTCAGGTTTTGTTGTTACCCTAGCATTTCCTCTCTCTCACACACAACAAACCCACTCATGGCGTCTCGGAGAGTCTTATCATCGCTGC
TCCGTTCATCTTCCGGCAGATCTGCTGCCAAATTCGGGAGCCGGAGCCCCAGGATTCCTTCTCCTTCCCCTGCTCGTTGTGTTTCTCCTTTCGGAGACCT
CCTCGGCCGCGTCGCCGAATATTCGACTTCTTCACCGGCAAACTCAGCTGCTCCATCGTCTGCCCCTGCCAAGGATGAGGGGAAGAAGACCTATGATTAC
GGTGGTAAAGGTGCGATCGGAAAGGTTTGCCAGGTCATTGGTGCCATTGTTGATGTAAGATTCGAAGATCAGGAGGGATTGCCTCCGATCATGACATCTC
TCGAGGTGCAAGACCATCCCACGAGGCTGGTGCTCGAGGTGTCTCATCACTTGGGTCAGAATGTCGTCAGAACCATTGCGATGGATGGTACCGAGGGTCT
CGTCCGTGGAAGGCGCGTTCTCAACACTGGCGCTCCAATCACTGTCCCTGTTGGAAGAGCTACCCTTGGACGTATCATGAATGTTCTTGGTGAACCCATC
GATGAGAGAGGCGAAATTAAAACCGACCATTACTTACCTATTCACAGAGATGCTCCGGCTTTAGTTGATCTAGCCACTGGGCAAGAGATCCTGGCAACTG
GTATTAAGGTTGTTGATCTGCTTGCTCCTTACCAAAGAGGAGGAAAGATTGGGCTCTTTGGCGGTGCTGGTGTTGGGAAAACTGTGCTCATTATGGAGCT
GATCAACAATGTCGCCAAGGCTCATGGTGGTTTCTCTGTGTTTGCTGGGGTGGGAGAACGAACCCGTGAAGGCAATGACCTGTACAGAGAAATGATTGAG
AGTGGTGTCATCAAGCTAGGCGAGAAGCAGTCAGAGAGCAAATGCGCTCTTGTGTATGGACAAATGAATGAGCCCCCGGGTGCTCGTGCCCGTGTTGGAC
TTACTGGATTGACTGTCGCTGAGTATTTCCGTGATGCTGAAGGCCAAGATGTCTTGCTTTTTATCGACAACATTTTCCGTTTCACTCAGGCCAACTCAGA
AGTGTCTGCTTTACTTGGACGTATCCCGTCTGCTGTCGGTTACCAGCCAACTTTGGCTTCCGATCTTGGTGCTCTTCAGGAGCGAATCACAACCACTAAG
AAAGGTTCTATCACCTCAGTCCAAGCCATCTATGTCCCTGCTGATGATTTGACTGATCCTGCTCCAGCCACGACTTTTGCTCACTTGGACGCCACAACCG
TGCTCTCGAGACAGATATCTGAGCTTGGTATCTATCCTGCTGTGGATCCTCTGGATTCGACATCCCGTATGCTCTCACCTCACATTCTGGGTGAGGATCA
CTACAACACGGCTCGTGGGGTGCAGAAAGTCCTACAGAACTACAAGAACTTGCAAGATATTATCGCCATTTTGGGAATGGATGAGCTTAGTGAAGATGAC
AAGTTGACTGTTGCCCGTGCCCGTAAGATCCAGAGATTCTTGAGTCAGCCATTCCATGTTGCTGAGATCTTCACGGGTGCCCCAGGAAAATACGTTGATC
TTAAGGAAAACATCAACAGTTTCCAGGGTTTGCTCGATGGTAAGTACGATGATCTTCCTGAACAATCGTTTTACATGGTTGGTGGGATTGACGAGGTGGT
TGCAAAGGCAGAGAAGATCTCCAAGGAGTCAGCAGCTTAAGTGCTTGATCCATCTTTCTTGGGTGCTTAATACTTCTCATCTTCTTCTTTTGTTGACAAT
AACGAAAACAAAACCAATGCTTTAGGCTGAGCTGCTAATGCATTGCGATTCCCATCATTGTGAGTGAGAGATATAGTACGGAGAAAAAATGTTCATTAGT
TGGAGATTTTGACTTCCAATAAAGAAGACAAAGTGTTGATGTTTTCCATTTTCTCCAAATTGTATTAAGTTATCGTATTCTTAAGAAAAGTTATTTTGAC
AGCTTTCACTGTTATTCTTTTTCAAGTAAGAAACCATTGACAAGAAATGTTTTTAAAAAAATTAGTGTTGAATCTGCACTTCACATTTAATTTTTCTTGT
CCTTCTGTATTTAGGGAATCTTTTATTTTTACAAATGCAGCACCATTAGTTTCTTCCTATGAGTTGATTCCGATGTACAACCTCCTCACTTAGGTATAAG
AAAGAATAAACAAACGTAAAACATACTGTATATAGTCTTCAATAATGTTCGAGAACCGCTCCTGTATGATTGAAGCCACAAGATATATGCACTGCTCTTA
CATTCTTTCCCAAGTT
CTTCGACGCCGTTCGATAGTTGTTTCTTCTTCCTCTCTCTCTTTCTCTTCCCCCCACCAAAACTTATAATGTCAAGTCGGCCTGAGTTGCTCGCGCCGCC
GGAGATATTTTATGACGAATCCGAGGCTCGGAAGTATACTTCTTCATCCCGTATCGTGGAAATTCAGGCGAGGTTGTCAGAGAGAGCTTTGGAGCTCCTT
GCTTTGCCCGATGATGGAGTTCCTAGATTCTTGCTCGACATTGGTTGTGGGTCTGGCCTGAGTGGGGAAACACTCTCTGAAAACGGGCACCAATGGATTG
GTCTTGACATTTCAGCATCAATGCTTAACGTTGCTGTGGAACGAGAAGTTGAGGGTGATCTTTTACTTGGTGACATGGGGCAGGGATTAGGTCTTCGTGC
AGGAGTTATAGACGGAGCCATCAGTATATCAGCTGTTCAGTGGTTATGCAATGCAGACAAGTCATCGCATGAACCTCGTTTGAGGCTAAAGGCTTTCTTT
GGGTCACTATACCGATGCTTATCAAGAGGAGCAAGAGCAGTTTTCCAAGTGTACCCTGAGAATATTGCTCAGCGTGAACTGATTCTTCGCCAGGCCTTAC
AAGCTGGATTTGGTGGTGGACTTGTCGTTGACTACCCGCACAGTACTAAGAAAAGAAAGGAGTTCTTGGTCCTCACATGTGGTTCTGTGCCAACCAGTAT
TAACGAAGGGTATAAAGAGAGTTGCTCTGAGGATGATGATAGCGAAGACGAGGAGAACGGAATGGTGGGTGTATCAGATAGGAATAGGCCGAGGAAAAAG
CAGAGAACGAACAAGAAAGGCAAAGGAAGGGAATGGGTTTTGAGGAAGAAAGAGCAGAGTAGAAGAAAAGGAAACGATGTTCCTCATGATTCCAAGTACA
CCGCAAGAAAACGCAAGTCGCGTTTCTGATATTCTTTATGATTTTGAAACGCTAATATACAGCGTTTTCTCAAAAAAAGTTTTGTCATGAAAAAGAAAAT
ATTGAACCATTCTACTGTTTCGACTTTTTTGTGTGTCAACTCAATGCTCGGATGCATCTTGTATTTTGCGTTAGCCT
CGAGAAAAATGAATGTGAATGCAGATGTCAATTTTGAAGAGCTTGCTCGATCAACTGATGATTTCAATGGAGCTCAGCTCAAAGCAGTGTGTGTTGAAGC
GGGCATGCTTGCCTTGCGCCGGAATGCAACCGAGGTCAACCACGAGGATTTCAATCAAGGAATAATTCAAGTACAAGCCAAGAAAAAAGCTATTTTGAAT
TATTATGCCTAAGTCCTCTTCTTTCTTCTATTACCATTATAGAAAAGTTCCAAGTTCTTGTCCCTAGTTTTGAATTTGGAACCCCTTCAAACTTCCAATT
TGTTATTATAAATATCAGCTTCAC
ATGCCTTCCATTCAAATCCCATCGGGGAAGATCCTGCAGCTTGAGATGGAGAATTTCAAGTCGTACAAGGGTCATCAGTTGGTAGGTCCTTTCAAGGATT
TCACGGCGATTATTGGTCCCAACGGGGCTGGCAAATCCAATCTAATGGACGCTATAAGCTTCGTCCTCGGAGTTCGCACCGGTCAACTTCGTGGCTCTCA
GCTTAAGGATCTAATCTACGCCTTCGATGATCGAGAGAAGGAGCAGAGAGGTCGTAGAGCGTTCGTCCGCCTCGTCTATCTCCTGGACGATGGTTTAGAG
CTCCATTTCACCCGCACTATTACCAGTGCTGGTGGAAGTGAGTACCGCATCGATAATAGGGTTGTGAATTGGGATGAGTACAATGGGAAGCTGCGATCTC
TTGGCATACTGGTTAAGGCTCGTAATTTCTTGGTGTTTCAGGGTGATGTTGAATCTATTGCTTCCAAGAATCCAAAAGAACTCACTGGACTCATGGAGGA
GATTTCTGGATCCGAGGAGCTTAAGAAAGAGTATGAGGAACTAGAAGAAAAGAAGGCCCTCGCTGAAGAAAAAGCAGCCCTTATATACCAGAAGAAGAAA
ACAGTAGGGAATGAGAAGAAGCTTAAGAAAGCACAAAAGGAAGAAGCTGAGAAGCATCTAAGGCTGCAGGACGAACTGAAAGCATTGAAGAGAGAACACT
TCCTATGGCAATTATATAACATTGAAAATGATATCGAGAAGGCAAATGAGGATGTTGATGCTGAAAAGAGCAATCGTAAAGATGTCATGGTAGAGCTGGA
GAAGTTTGAACATGAAGCTGGTAAGAGAAAGGTAGAACAAGCAAAGTATCTGAAAGAGATTGCTCAACGCGAAAAGAAGATTGCTGAGAGAAGCTCGAAG
CTTGGAAGATACCAACCTGAGCTTTTGAGATTGAAGGAGGAGATAGCACGCATAAATTCAAAAATTGAGAGCAATCGAAAGGAGGTGGATAAGAGGAAAA
AAGAAAAGGGAAAGCATTCCAAAGAAATTGAACAGATGCAGAAAAGCATTAAGGAGCTGAATAAGAAAATGGAAATATTAAATGAGAAGAGACAAGATAG
CAGCGGAAAACTTCCAATGCTTGACAGTCAACTGCAAGAGTATTTTCGAATAAAAGAAGAAGCAGGGATGAAAACCATTAAGTTAAGAGATGAGAAAGAG
GTTCTAGATAGGCAACAGCATGCTGATCTCGAAGCATTGAGAAATCTGGAAGAAAATTACCAGCAACTAATTAATAGGGAGAATGATCTTGATGAACAAA
TCGAGCGACTGAAATCCAGGGAAAAAGAGATTGAAGATTCTTCTTCGGAATATAAAAATGAAACAACTAGTCTGAAAAAGCAGTTACGAGCGCTGCAAGA
AAAGCATCGAGATGCCAGGATTGCTTCTGAGAAATTGAAGACTAGAATCACAGAAGTAGAAGACCAGTTAAGTGATCTAACGGCTGAAAGATATGAAAAT
GAGAGAGATAGTAGGCTTACACAGGCTGTTGAGAGTCTCAAGCGTCTATTTCAAGGAGTTCATGGTCGGATGACTGATCTTTGTCGACCAAATCGGAAGA
AGTACAACCTTGCTGTTACTGTTGCTATGGGGAGATTTATGGATGCAGTAGTTGTAGAAGATGAAAACACAGGAAAAGACTGCATCAAGTACTTGAAAGA
GACAAGGCTTCCTCCTATGACATTTATTCCTCTTCAGTCAGTCCGTGTCAAGCCAGTGCTTGAAAGATTGAGAAATTTGGGCGGCACAGCAAAGCTGGTG
TTCGATGTTAATGTGAGCATGTTTCAATTTATGTTTTTGAACCTTAACCACTCCACGTTCGATCCTGAATTGGAGAAGGCGGTCCTCTTTGCTGTTGGAA
ATACTCTTGTCTGTGACGAGCTTGAAGAAGCCAAGGTTCTGAGCTGGACTGGAGAGAGGTTTAAAGTTGTTACTGTTGATGGTATATTACTCACAAAGGC
GGGAACAATGACTGGTGGTACCAGTGGTGGAATGGAAGCAAAGTCTAATAAATGGGATGATAAGAAAATTGAAGGACTGATGAAAAAGAAAGAAGAATAT
GAACTAGAATTGGAAAAGATTGGATCTATTCGAGAAATGCAAGTAAAGGAGTCCGAAATATCTGGTAAAATAAGTGGACTTGAAAAAAAGATTCAGTATG
CTGAAATTGAGAAGAAAAGCATGAAAGACAAACTTCCACATCTTGAGCAAGAGAAGAGGAATATTGCTGAAGAAAGTAGACGCATAACTCTTGAACTTTC
TAAGGCAAAAAATGAGGTTGATAAGAGGAATACAGAAATCAGGAAGTTGGAGAAAAGAATCAATGAGATTACCGACCGTATCTATAAGGATTTTAGCCAG
TCTGTTGGTGTTGCAAACATACGTGAATATGAAGAAAATCAGCTCAAGGATGCTCAATATGTGGCTGAAGAAAGGCTGAATCTGAGTAACCAGCTTGCTA
AGTTAAAATACCAGCTGGAATATGAGCAAAACCGAGATGTGGGGTCACGAATTCGAAAGCTAGAATCTTCAATCAGTTCTTTGGAAACAGATTTGGAAAA
AATACAGCAGAGGAAGTCTGAACTGAAGGAGTTAACAGAAAAGGCTACTAATGAAATCAACAATTGGAAGAAGGAAATGGGAGAGTGCAAACAAAAATCG
GAAGAGTATGAAAAGGAAATCCTGGACTGGAAAAAGCGGGCTTCTCAAGCGACAACAAGCATAACCAAACACAATCGTCAGATACATTCTAAGGAAACGC
AAATTCAGCAGCTGATCTCGCAAAAACAGGAAATAACTGAGAAATGTGAGCTCGAACGTATCACCCTTCCTGTTTTATCAGATGCTGAGGAAGAAGATGA
CTCAGATGGGCCACAGTTTGACTTTAGTGAGTTAGATAGAGCTTATCTCCAGGAGCGGAGACCATCTGCTCGTGACAAATTGGATGCAGAATTTAGGCAG
AAAATAGAATCTAAAACATCGAAAATTGATAGAACGGCCCCAAACTTGAGAGCGCTTGACCAGTATGAGGCTATACAAGAGAAAGAAAAGCAAGTTAGCC
AAGAGTTTGAAGCGGCCAGGAAGGAGGAGAAACAAGTAGCGGATGCCTATAATACTGTTAAGCAGAAGAGGTATGAGCTATTTATGGAAGCTTTCAACCA
CATTGCTAGCAACATTGACAAGATCTATAAGCAACTAACCAAGAGTAATACGCATCCGCTGGGTGGGACTGCTTATCTAAACCTAGAAAATGAGGATGAT
CCTTTTCTACATGGTATAAAGTATACCACGATGCCCCCAACAAAGCGATTTCGTGACATGGAACAGCTCTCTGGAGGAGAGAAAACAGTTGCAGCCTTGG
CGTTGCTCTTCTCCATCCATAGCTATAGGCCTTCACCCTTTTTCATACTTGATGAAGTGGATGCTGCGCTCGATAATTTAAACGTCGCAAAAGTTGCTAA
ATTCATTCGTAGCAAATCATGCCAAGCGGGACGTGACAATCAGGATGCAGAGGATGGGAATGGCTTCCAAAGCATTGTAATATCTCTGAAGGACAGCTTC
TATGACAAGGCCGAAGCTCTGGTTGGAGTTTACAGAGACACCGACAGGAGTTGCTCAAGTACGATGTCATTTGACCTTAGAAACTACCAAGAATCGTGAT
TGGTTCTCCAATCCCCCCGGGGTTTACTTTTAGGGTTTAGGTAAGTATAATAAACCCTAACGTTGTATATATATGAAGTACTGAATGGTGTCTAGGTTTT
AAATACTGTCTCGCAACGTTAAAAGGTATTTCACAGTGGAATGGTGCTTTATTTGCGTTTTGATGTGGCATAGGACCTCCTAAGATCTGACAATTTAGAA
CATGTGGAACTTTTTTTTTAATATGATATAAAAAACTCTAGTTGAATCT
>osa
GAAGCGATCTCTCCCCTTCGCCGCCGCCTCTCTCCCGCACCAAGCTGCCTGAGCCCTAGCCGCCGCCGCCGCCGCCGCGCGCCACCACCGCAACCATGGC
CGCCGCGCTCACCCGCCCGCCTCCAGGCACGGTCCAGTGCTTCGGGCGCAAGAAGACGGCGGTGGCCGTCTCCTACTGCAAGCCGGGGCGCGGGCTGATC
AAGGTGAACGGCGTCCCGATCGAGCTGATCAGGCCGGAGATGCTCCGCCTCAAGGCGTTCGAGCCCATCCTGCTCGCGGGGCGCTCGCGCTTCAAGGACA
TCGACATGAGGATCCGCGTCCGCGGCGGTGGGAAGACGTCGCAGATCTACGCGATCCGCCAGGCCATCGCCAAGGCCCTCGTCGCCTACTACCAGAAGTA
CGTCGACGAGGCGTCCAAGAAGGAGGTCAAGGACATCTTTGCCCGCTACGACCGCACCCTCCTCGTCGCCGACCCCAGGCGCTGCGAGCCCAAGAAGTTC
GGTGGTCGCGGCGCCCGCGCAAGGTTCCAGAAGTCGTACCGCTGAGCGCTCGCCGGACCGATTCGGAGCGGTGTTCTCTTTTCCACCCTATCAATGGAGC
TACTTGGCTTGTTCTACATCTATCTAGCTACTGCATTACTTTCAAGTTTAGTCTTTTAAAACTTAGCCCTGAACCTTGCCTTTTTGACATTGTGAAATGG
ATGTGATTGAAATGTTTAAGACTCTACTCTAGTCTCTGGAATATGGTTTTGCCTGTTACCTATGTTGAGTTATATTTATGTTGTTAAGATGATCCATACT
GCAAGTGTTATGCTATGTTAAGATGATTCTGCGAGTAGTGTTGCTGTCTGCTTTGGTACCGCTACTGTTATGTTGTGATTGTGACATGCTCATTTCAGGT
AGTTAGGGTTTTCAAATTTCAATTAATTCCCATGGAAATGCTTGTTCAGCTCCTTAGGGTTGCAAATTTCAAGTAATTCCAATGGAAATGCTCGTTTGCT
GT
ATTCCCCGCAGCGCGGAGCCGCCGCCACTCCCCCCCACCCTCACCCCGCAGACCATTCGGAAAACCTAGATCCGAGCCTTCCCCCTTCCCCTCCCCCGGC
GGCGGCGGCCATGGCGACCCGCCGGGCCCTCACCTCCGTCCTCCGCTCCGCCTCCCGCCTCCGCGCCGCCTCCCCTTCCCCGTGCCCGCGCCGCGCGCCG
CTCCACCCCCACCGCCGCCCGTCCCCCGCGGGCTTCCTCCTGAACCGCGCCGCCGCCGCCTACGCGTCGTCCGCCGCGGCGCAGGCGGCCCCCGCGCCTC
CCCCCGCGTCGGGCAAGGCCACCGGGGGCGGCAAGATCACCGATGAGTTCACGGGCGCTGGCGCCGTCGGGCAGGTGTGCCAGGTGATTGGCGCCGTCGT
GGACGTGCGGTTCGACGAGGGCCTGCCCCCGATCCTGACCGCGCTGGAGGTGCTCGACCACAACATCCGCCTCGTGCTCGAGGTGGCGCAGCATCTCGGG
GAGAACATGGTGCGCACCATCGCCATGGACGGGACCGAGGGGCTCGTTCGCGGCCAGCGCGTGCTCAACACCGGCTCTCCCATCACTGTTCCTGTTGGTA
GGGCCACACTTGGGCGTATTATGAATGTCATCGGTGAGCCTATTGATGAGAAGGGAGATATCACAACAAACCACTTCCTCCCTATCCATCGTGAAGCCCC
TGCTTTTGTTGAGCAAGCTACAGAGCAACAGATTCTTGTTACTGGAATTAAGGTCGTGGATCTCCTTGCACCCTATCAAAGAGGTGGTAAAATTGGTCTC
TTCGGTGGTGCTGGGGTGGGCAAAACTGTACTTATTATGGAGTTGATCAACAATGTTGCGAAGGCTCATGGTGGTTTCTCTGTCTTTGCTGGTGTTGGAG
AACGTACTCGTGAGGGTAATGACTTGTACAGGGAAATGATTGAGAGTGGTGTGATTAAGCTTGGTGACAAGCAGAGTGAGAGCAAGTGTGCTCTTGTCTA
CGGGCAAATGAATGAGCCCCCGGGTGCTCGTGCTCGTGTTGGACTGACTGGTTTGACTGTTGCCGAGCATTTCCGTGATGCTGAAGGGCAGGATGTGCTT
CTCTTCATTGATAACATTTTCCGTTTCACTCAGGCAAACTCCGAGGTGTCTGCCCTGCTTGGACGTATCCCATCTGCTGTGGGATACCAGCCAACCCTTG
CTACTGATCTTGGAGGACTGCAGGAGCGGATTACCACCACAAAGAAGGGTTCTATCACATCTGTTCAAGCTATTTATGTGCCTGCTGATGACTTGACAGA
TCCTGCCCCTGCTACTACATTTGCCCATCTTGATGCTACTACTGTGTTGTCACGACAGATTTCTGAGCTTGGTATTTATCCTGCTGTCGATCCTTTGGAT
TCCACATCCAGAATGTTGTCTCCCCATGTACTGGGTGAGGACCACTACAACACAGCTCGTGGTGTTCAGAAGGTTCTTCAGAATTACAAGAATCTTCAAG
ATATTATTGCCATTCTGGGAATGGACGAGCTCAGTGAGGATGATAAGTTGACAGTCGCTCGTGCTAGGAAGATTCAGCGGTTCCTTAGCCAGCCCTTCCA
CGTTGCCGAAGTTTTCACGGGTGCACCTGGAAAGTATGTTGAGCTGAAGGAGAGCGTTCAAAGTTTCCAGGGTGTATTGGACGGGAAGTATGATGACCTT
CCTGAGCAGTCATTCTACATGGTTGGAGGAATCGATGAGGTCATTGCCAAGGCAGAGAAGATTGCCAAGGAGTCCGCTTCATAAGCGATGCAATTTTTAA
CATTTGGAGGTCAACATGTTGTGCCTTTTATGTTTGTTAGCCAGGACATGTACTTACATGCAGGAGGCCCGGCCCTGCTGATCGATGTTTTTCCCCTCCA
CTTTTTTCCAAATAAGGATTTGCAGTGACCTATTTGTTTGGCTTACTGCCCTTCAAGGAAGAATTGAGTTCTCTTTTTGTGTGATGTGCGGCCAGTCCGG
CAGTCCGTGAACTTGTTACTTGCTGAAAACACTGAAATATTGGTCTCCCATACAGCACCTCTGTGAAAACTCCTCATTTATACTTCCAACATGTTTTGAG
AGCCGATATAAGCCGTGTTTCGATTCAAAA
ATGGTTACCCATGGCGGCGGCGGCGGCGGCGGCGCTCGGACGATTTGGGACGACGAGGCGGCAGCGGCGGCTGGTGTGATGAGACGAAGCCCTAGATGCG
TGGGAGAATTTATAGGAGATCCGTTGCTGGGCCGGGATATTGTTTTGGGCCTTTGGGATTCTCGGCCCATTTCACGTGTCTCGCTACACCGGAGGCCCAT
GAAGAGCCCAGTAGAAAGGCGTAGTGTAGTGGGAACCCTCGGGGAGTCGCGGCGCGAGCACACCACTGACCTCTGCGGCGGCGGCGAGGAGAGGAGAGGG
GAGAAGCCGAGGAGGAGGCAGCGGGGAGAGAGGATGCCGCGGCCGGAGGTGCAGGCGCCGCCGGAGATATTCTACAACGAGTCGGAGGCCCGCAAGTACA
CCACCTCCTCTCGCATCATCGAAATCCAGTCGAGGATTACCGAGAGGGCGCTCGAGTTGCTTGCGCTACCCAACGATGGCGTCCCCAAGTTGCTTCTCGA
CATCGGGTGCGGTTCTGGACTTAGTGGCGAGACATTGACAGAGCAGGGCCATCACTGGATTGGTTATGATATTTCGAAGTCCATGCTTGATGTTGCTCTG
GAGCGTGAAGCGGAGGGTGATCTCCTTCTTGCAGATATGGGCCAGGGTTTAGGCTTGCGGCCTGGAGTTATTGATGGAGCAATCAGTATTTCAGCAGTTC
AGTGGTTATGCAATGCTGACAAGTCTTGTCACAACCCAAGATTGCGGTTAAAGGCTTTCTTTGGATCATTATATAGATGCCTAGCAAGGGGAGCAAGAGC
CGTTTTGCAATTTTATGCTGATAATGTGAAGCAGAGTGAAATGATCGTGACTGCTGCCATGCGTGCTGGATTTGCAGGTGGAGTGGTTGTTGACTGGCCT
CACAGTTCAAAAGCAAAGAAATCCTACCTTGTCCTCACTTGTGGACCACCTTCTCTAAATTCATCGCTTCCGAAGGGTAAAGGTCAAGATGGTGCCATGT
GTAGTGATGATGATGAGAGCGATGATGGAAGTGGTGATGAAGATGGAGCCCAAACAGTCGGCATATATGAAAGAAATAGGCCAAAGAAGAGGCAGAAGAC
GAAGAAGAACGGCAAGGGCAAGGCTTGGCTCTTGAACAAAAAGGAGCAGCTGAGAAGGCGAGGACGGGAGGTGCCCGCGGACACCAAATACACAGGGCGG
AAGCGGAAAAGCTACTTCTAGTTTCAAATGATTCTTGGAATGCCTGTGCACCATTTTGCCGTTTGTCATACTAGTAGCTCATTATTAGTAGTACGAGAAA
GGTTCAGTTGAAGAGTTGGGTGAATGCGCTCTCTCTCTCTACACCATAGAGCCGTTCATGTTCTGTAACCTTCTAGCAATTCTGAGTTTTGACAAATGCT
GTGCAAATCTATGTCCTACTTTTGAAGGATCCAGTATTGTATGTTTGTTGCTTAAAATTTTACATGGGTTTTGGCAAAAAAAAAATGCACGGTTTGATTT
GACG
GGGTTCATAACTACAGTAAACTGACCAACGCAAACCGCATCGATCAACTCCTTCCCCAAGTCGAAGCAAAATCCCTAGCGATGTCGTCGCCGCCGCCCGC
CGCCGCCGCCGCGATGGCCGTCGACGACGCCGACGACGACCAGCTCGCCTCCATGTCCACGGAGGACATCGTCAGGGCAACCCGCCTCCTCGACAACGAG
ACCCGCGTCCTCAAGGATGAGCTGCAGCGGACGAACCTTGAGGTGGAATCCTACAAGGAGAAGATCAAGGAGAACCAGGAGAAGATCAAACTCAACAAGC
AGCTGCCTTACCTTGTCGGCAACATCGTCGAGATATTGGAAATGAACCCCGAGGATGAGGCTGAAGAGGATGGTGCGAACATCGATCTGGATTCACAAAG
GAAAGGAAAATGCGTTGTTTTGAAGACATCCACAAGACAAACAATATTCCTTCCTGTAATCGGGCTTGTTGACCCTGAAAAGCTCAAGCCTGGGGATTTG
GTTGGAGTCAACAAAGACAGCTACTTGATACTAGACACGCTACCTTCAGAATATGATTCACGGGTTAAGGCAATGGAGGTAGATGAAAAGCCTACAGAGG
ATTACAATGACATTGGTGGCCTTGAGAAACAGATTCAAGAGCTTGTTGAAGCAATAGTATTGCCCATGACTCACAAGGACCGGTTTCAGAAGTTGGGAAT
TCGCCCCCCGAAAGGTGTTCTTTTGTACGGACCACCTGGCACTGGAAAGACCCTAATGGCTCGTGCATGTGCTGCCCAAACTAACGCCACATTTCTGAAA
CTTGCTGGTCCACAGCTTGTCCAGATGTTCATCGGTGATGGTGCAAAGCTTGTCCGTGATGCCTTTCAGCTTGCAAAGGAGAAATCCCCCTGCATCATTT
TTATTGATGAAATTGACGCAATTGGAACAAAGCGTTTTGATAGTGAAGTTAGTGGTGACAGAGAAGTGCAGCGCACAATGTTGGAGTTGCTGAATCAGCT
AGATGGATTCAGTAGTGACGAGAGGATAAAGGTGATAGCTGCAACTAATCGCGCGGACATTCTTGATCCTGCTTTGATGAGGTCTGGTAGGCTGGACCGA
AAAATTGAGTTCCCTCATCCATCCGAAGAAGCACGAGCTAGAATTTTGCAAATCCATTCAAGAAAAATGAATGTAAACCCTGATGTCAACTTTGAAGAGT
TGGCACGATCTACGGACGACTTCAATGGTGCACAACTGAAGGCCGTTTGTGTAGAAGCAGGCATGCTTGCCCTACGCCGAGATGCTACAGAGGTGACACA
CGAGGATTTCAATGAAGGGATCATACAAGTGCAAGCCAAAAAGAAGTCCAGTTTAAATTATTACGCTTAATTCTTCCGAGAGAGTTATTAGGCCTAAGGA
AACGCTCCGTCCAAAATTGTTTGTTTGTAACACTACCGTTTTATATATTTGTGTGGTTCAAGATGTGATTGTACGAAACATGTCTTGCGCTGTTCCTTCT
CTGCTTGATATATACTGATAGAAGTTGACTCGTCCCTTGCGTAATTGCGTTCACGTGTGTTTGGCTTCTTGCGTGTCAAAACTGGCAATTCGAATACTGG
ACGATTTAGGATTACTCGGCTGGCATTGATGCTTCCTTGGATTAAA
ATCGTTTTGCTCCGCTCCGTCATTCGAATCTCGTTTTGGCCGGAAACCCTAGTTCGCTTGGAGTTGGCCGGAAACCCTAGAAGCGATGGCCGCGGCGGCG
GCAGGCAAAGGCGGCGGCGGGCAGGGGCGCATCCATCGGCTGGAGGTGGAGAACTTCAAGTCGTATAAGGGGACGCAGACAATCGGGCCCTTCTTCGACT
TCACGGCCATCATCGGTCCCAATGGCGCCGGCAAGTCCAACCTCATGGATGCCATAAGCTTTGTGCTCGGCGTTCGATCCGCCCACCTCCGAGGCGCCCA
GCTCAAGGACCTCATCTACGCCCTCGACGACCGCGATAAGGAGGCCAAGGGCCGCAGAGCCTCCGTCCGCCTCGTCTACCACCTCCCCGCCACCGGGGAC
GAGCTCCACTTCACCCGCGCAATCACCGGCGCCGGTGGCAGCGAGTACCGGATCGACGGCCGTCTCGTCACCTGGGACGACTACAACGCCAAACTCAGAT
CCCTGGGCATCCTCGTCAAGGCTCGCAATTTCCTCGTCTTCCAGGGTGATGTGGAATCCATTGCCTCCAAGAATCCCAAGGAGCTCACCGCACTTCTGGA
GCAGATCTCTGGCTCTGACGAGCTCAGGAGAGAATATGACGAGCTGGAGGACCAAAAAAACAGGGCCGAAGAGAAGTCTGCGCTTATTTATCAAGAGAAA
AGGACCATCGTCATGGAAAGGAAGCAGAAAAAGGCTCAAAAGGAAGAGGCAGAGAATCATCTACGCCTCCAGCAGGACTTGAAACTAGCCAAGACAGAAC
ATCTCCTATGGCAACTCTACACCATTGAAAAAGATGCAGAGAAAATAGAAGCTGAACTTGAGGAGGATAGGCGGTCTCTTCAGCAAGTGCTGGAAGAGAA
CCAGTCCTCTGACTATGAGCTTTCTGCAAAAAAGAAGGAGCAAAGTGGGTTTCTCAAGAAAATGACATTATGCGAGAAGAGTATAGCCAAGAAAAAGCTT
GAACTTGACAAGAAACAACCTGAGCTTCTTAGATTGAAAGAGCAAATTTCTCGGCTGAAATCCAAAATCAAAAGCTGCAACAAAGAGATCGACAAAAAGA
AGGATGATAGCAAGAAACATTTGGAAGAGATGAAAAGTTTGCAGAGTGCTTTGGTTGATGTCACAAGAGCTATTGATGAGTTGAATGAGCAAGGCCAAAA
TAAAAGCGACAAACTGCAATTAGCTGATGACCAACTCCAGGAATATCATAGAATTAAGGAAGATGCGGGAATGAGTACTGCAAAACTGAGAGACGAGAAG
GAAGTTTTTGATAAAGAGCTTAATGCTGGCGTTGAAGCAAAAAAGAATTTAGAGGAGAATATGCAGCAGCTGCGTAGCCGTGAGAATGAGATTTTGTCAC
AAGAGCGTGAATTGCGTGCAAAGCTTAATAAAATTCTTCATTCAATCCCCAAGCATGAAGATGAGCTTGCTCACTTACGTGAGGAACATAACAAAATTGC
AAAGGAGCGCCAGACCTCAGGAGTTAAATACCAAATGTTGAAGCAGAGGTTGGATGAGATAGATACAAAATTACGAGAGCTCAAAGCTGACAAGCATGAA
AGTGAGCGGGATGCTCGATTTTCAGAAACAGTTAGGAGTTTAAAGCGGCTATTCCCTGGAGTCCATGGTCGCATGACAGAACTTTGTAGGCCTTCACAGA
AGAAATACAACCTTGCTGTCACTGTTGCTATGGGGAAGTTCATGGATGCAGTAGTGGTAGAAGATGAGAACACAGGAAAAGAATGCATTAAAGTACCTCT
TTTGTGACTTTTACTCAGCTGATTCTTCAACATTTTTCTTATATCGGGAGAGCTCATTATATTATCTGCAGTAGTCAATTGTAATACTTATTTTTTTTTT
CAAAGCGTACCTTTGGAAATTAAAATACGTAGAACCTCTTTTAATGAAATAAAATGAATAGCTTCACGTGAACTGTAAACTGTTGAAAGAAGTTTGAACT
GATTCCATTCAAATGGATGTGACGGTCACATGGAGGGAGAGTTTGTGAGTAGGGCATTTGATAGATCAATATCATATTTGGGGATTCTGTTGACTCACAT
CCATTCAAATTAGTCCCATGTAAATTTCATCAAATAACTTATTTGAGTAATATTAAGATAACCTGACTATAT
>ppat
CTCCGCCCTCATTGAAACTCTCTTTGCGTCTCGCTGCGTAGCGTCACAGCCCCACAGCTCGGGTCGAGGATTAGACCATCGACAATGGCCACCCCCACGG
AGTCAGTGCAATGTTTTGGCCGGAAGAAGACGGCTGTGGCCGTGACCTACTGCAAGAAGGGCAGAGGTTTGATTAAAATCAACGGGTGTCCTATCGAGCT
CGTGGAGCCCGAGATTCTCCGATACAAGGCGTTCGAGCCCGTGTTGCTCTTGGGAAGGCAGAAGTTCGCTGGTGTGGACATGCGCATTCGCGTCAAGGGC
GGAGGTCACACCTCGCAGATTTACGCCATCAGGCAGAGCATTGCCAAGGCGCTTGTGGCGTACTTTCAGAAGTACGTAGACGAGCAGTCGAAGAAGGAGA
TTAAGGATGTGCTTCTGAGGTACGACAGGACTTTGCTTGTGGCTGACCCCCGCCGCTGCGAGCCGAAGAAGTTTGGTGGTCGTGGTGCTCGCTCTCGTTT
CCAGAAGTCTTACCGTTAAGCGGCGGGTCGATTGGAGTGTTTACAGTGGTCGTGGGGGCGGTGTACGTGATTCGTTGTCTCTGGTAGGGGGTTTTTTCCG
GAGTTTTAGGTTTGGATCACCCAAAAGCTGTGTTCGTGGATCATATTTTTTCTGGAACGTTCCGTCTGCCGAAATGTTTAGAGCTGTCTGACCTAAAACT
GGAAACGGAGCCTCCCTTGTTTTTCTTGCCTATGCCTCATTCAGGATGGAAACACTGCCTCCTTTACTTTAGCCTTACGCACTGTGTTGATCTTCTGCAG
TCTTCTGTATGCATGTCAATTGCTTTTTTGCTTCATTTTCTCTTGTATGGGATACCGCTCCCTCTCAGTTATTTACCCTTCTTTTAGGGTTTGGGTGAAG
TGACTTGTTACTCGTTTTGACCTTGATGACGAGTTAAGTTTACCTAGGG
GATGATCGTTGTCCCTTCGAAGTCGGGTTGGCCCCGTTGTGCATGGCAGCGACGCAGCGACACAAGAGGGGCCAGGAAAGCTTCTTCTTACCTGTGTGTT
CAAGTTTTCGGTGCTGGAGCCCCGAGCGCAAACCCTAGAGGGTGTGCGGGAGATTTTGCTTGTTGTCGAGTGTGGGTTTTTGGTTTTCTGAGGAGGAGGG
GTTTGTAGGGTGATAGACGGCCATGTCGGGACGCAAGGCGTTGGCCGCTGCGCTGCGGGCTGGCTCACGCAGGCTCGCGTCTTGTCAGACCCCGAAGGGG
TCGAGATCGGTGTCTTCCAATGCCCCCAATGGCAGAGCTGTCGCGAATGCGGCTGCCAAGGGCCTGTCCCGATCGTCGTTGTTCCAGGGCGTCAGGGCTG
TAACACCTGCGCTAGCGCGCAGCATGTCCACAGATAACAAATCGACGGACTTCACCGGCGCTGGAAGCGTGGGTTCCATTGCGACAGTGATCGGAGCCGT
GGTGGACGTGAAGTTTGAGAAGGGCTTGCCACCCATTCTGACCGCCTTGGAGGTGCAGGACCACAACCTGAGGGTTGTATTGGAAGTGGCGCAGCATTTG
GGAGAGAACACTGTGCGGACGATTGCTATGGAAACGACCGATGGGCTTGTTCGCGGGCAGCGAGTGTTGAACACCGGGTCTCCTATCATGGTCCCCGTGG
GGCGTGCAACTTTGGGTCGTATTATCAATGTCATTGGTGAAGCTATCGACGAGAGAGGCGATATCAGCCGAGAGCATGTTCTTGGAATTCATCGTGAGGC
CCCTGCCTTCGTGGACCAAGGAACAGAGATGGAGATTTTGGAGACTGGAATCAAGGTCGTTGACCTATTGGCGCCCTACCAGCGAGGTGGTAAGATTGGA
CTGTTCGGCGGTGCAGGAGTGGGGAAGACGGTGCTGATCATGGAGCTGATCAATAACATTGCAAAGGCCCACGGAGGATTTTCAGTGTTCGCTGGAGTAG
GAGAGCGCACCCGTGAGGGTAACGATCTGTACAAGGAGATGATTGAGAGTGGTGTGATCAAGCTGGGTGACAAGCAGATGGAGAGCAAGTGCGCTCTGGT
GTATGGACAGATGAACGAGCCCCCTGGTGCCCGTGCCCGAGTGGGTCTGACTGGACTGACTGTGGCAGAGCACTTCCGTGATGCTGAGGGGCAGGATGTG
TTGTTCTTTATCGACAACATTTTCCGTTTCACCCAAGCGAATTCGGAGGTGTCTGCTCTGTTGGGTCGTATCCCATCTGCTGTGGGGTACCAGCCTACTC
TGGCGACTGATCTGGGAGGACTCCAAGAGCGAATCACGACAACGCAGAAGGGATCGATCACCTCGGTTCAGGCTATTTATGTGCCCGCCGATGATTTGAC
GGATCCTGCCCCAGCGACTACTTTTGCCCATCTGGACGCCACGACTGTGCTGTCTCGTCAAATTTCTGAGCTGGGTATTTACCCTGCTGTGGATCCTTTG
GATTCGACCTCCCGTATGCTGTCCCCGCGCATTTTGGGAGAGGAGCATTACTACTGCGCACGAGATGTGCAGAAGGTGCTGCAAAACTACAAGAACTTGC
AGGATATCATTGCCATCTTGGGTATGGACGAGCTGAGCGAAGACGACAAGTTGACTGTGGCACGCGCGAGGAAGATGCAGCGATTTTTGAGTCAACCCTT
CCACGTGGCCGAGGTATTCACAGGGTCGCCTGGAAAGTACGTGGACTTGAAAGACAGCGTTGCTGGATTCCGGGGTGTGTTGGATGGAAAGTACGACGAC
TTGCCTGAACAGGCCTTCTACATGGTTGGCGGCATTGAGGAGGTTTCACAGAAGGCAGAGAAGCTGGCTAAGGATATGGCATAAGCAAGAATTGGATGTA
CAGTAGTGGCGAACTTTGCCCTGATGCTTCCTTCTGAAGGCTGTTTTTTCTAATCAAAACGTGGTAGTCATCATTGCATTAATAATATATG
TTAGGGTTCAAGGATATAGGGTCTTAGTTAGCATCCATCGGTGTTACTGGAGCACTGCGAAGGGGTATCGTCGTCGTCGTCGTCGTCGTCGTGATTCTCA
ACAACTCTATGTCCGGCATCTCGCAGTTTAGCTGCGCATTGCAGTTCGCTTTGGAGGTTTAGGGTAGAAACACCGTGTGGAACCGAGGCTGTTCCACTTT
GCTGTTGTGCAGATTCTGCGTGTTGCGAGGAGGTAGCCAGAGGGGGGTGCGATGTCGATTCGGCCAGAAAGGCAAGCGCCGCCCGAGATTTTCTACAACG
ACACAGAAGCTAGGAAGTATACGACCTCGTCGCGAATTGTAAATATTCAGGCCAAGCTGTCGGAGCGAGCGCTGGAGCTTCTGGCGCTTCCTGACGATGG
CGTGTCACGTCTGCTTCTGGACATCGGGTGCGGGTCTGGTCTGAGCGGAGAGACTTTGAGTGAGAATGGGCATCACTGGATCGGAATGGATATATCGGAG
GCTATGCTGGATGTTGCGTTGGAGCGTGAGACGGAGGGAGATCTTTTGCTGAGTGATATTGGCCAGGGTATGCCTTTCCGGCCTGGCACTTTGGACGGGG
CTATCAGTATCTCCGCCGTGCAGTGGCTTTGTAACGCTGATAAGTCGTGCAACAATCCGCGGTTACGGCTGAAAGCTTTCTTTGGCACCTTATATAAGTG
TTTGGCGAGAGGAGCCAGGGCAGTTTTGCAAATTTACCCGGAGAGTCCGCAGCAGTTGGAGATGATCTCATCTGCAGCAATGAAATCAGGGTTTTCGGGC
GGTTTAGTTGTAGATTATCCTCACAGTACCCGAGCAAAGAAATACTTTCTTGTTCTCAGTTGTGGCCCACCTAGTACGGCCACCGCGCTCCCCAGGGCCA
AAGAGGGCAATGAGATGAGTGAGGATGAAGAGAGTGGCAGCGAGTGTGATGAAGATGGAGGCACTACTGTGAATGTATCTGAGAGACAACGACCTTCTAA
GAAACAGAGGAAGGATAGCAAGAAGAGTGGAAAGGGTCGTTCTTGGATTTTAAAGAAGAAAGAGCAACGTAGGCATAGAGGGTACACGAATGTCCCAGAT
GATTCCAAATATACAGGCCGAAAAAGGAAAGCTCATTTCTGAGGTTACCCTAATGAATACTGAACTATGACAAGTGTTCGTCCTTGGTGTCTATGCGAAG
GTAATAAATGTAAAGAATTTTGAGTGTCATCACATTAGCTCACCAAGTTACTTGGGAATGTTGGTAACTAATTGGTGTGTGATTTTTGTTGCAAGTGATT
GTAGTGATTAACACCTAGGATATGTTCTCTATTAATAGTTTATAAATTACAAGTTTTGTGGTTTATTGAAAGGTATGCTTATGTCAGCATGGGTTTTGTT
TTTGTCATCTACTTGAGATATTTTTTGTTCCAATCAGAAATTTGATCAATCAAATGGTTTGAAAGATATTGAACAAAAAATATTTGATTGATTTGAAAGG
TTTTGAGTGAAGGTGATATATGGTGAGTGGGTATTGTGCTGGCAG
GCAGAGTTATGCGGAAATCAAGCAGTGTGGGCGTGAAAATGTGCTCGGGACACCGCGATGATTGTTAATCAAAAGTAAGACAATTGCGAGCTCTTGAAGA
AGAAGAAGACGAGAAAAGAGGAGGAAGTGACACGCAGAAGGGCGTTCAACATGAACGAGGAGGACATCTTCGGAGACGATGCCTCCGACGAGCTAGCGAG
GTTGACACCGGAAGATATTCAGCGAAGAGGCCGATTACTGGAGAATGAGACCCGCATCTTGAAGGACGAGACACAGAGGTTGACTCTCGAGCACGATGCT
ATGAAGGAAAAAATTAATGAGAATCAGGAGAAGATCAAACTCAATAAACAGCTGCCTTACCTAGTTGGAAACATTGTGGAGATATTGGACGTCAATCCAG
AAGATGAAGCTGAAGAGGATGGTGCTAATGTTGATTTGGACTCTCAAAGGAGAGGAAAGTGTGTCGTCTTGAAGACATCCACACGTCAAACGATCTTCTT
GCCTGTAGTTGGTCTAGTCGATCCAGATAGTTTGAAGCCCGGTGATTTGGTTGGAGTAAACAAGGACAGCTACCTGATTCTGGATACACTGCCTTCGGAA
TATGACTCACGTGTAAAAGCTATGGAGGTCGACGAGAAGCCTGCAGAGGTGTATTCAGATATTGGTGGTCTCGATAAGCAGATTCAAGAGTTGATGGAAG
CCATCGTACTACCTATGACCCACAAAGAACGGTTCGATAGCTTAGGTGTCCGACCACCCAAAGGAGTGTTATTATATGGCCCACCAGGTACTGGCAAGAC
CCTCATGGCTCGTGCATGCGCAGCTCAAACAAATGCTACTTATTTAAAGCTTGCTGGACCTCAGCTCGTCCAGATGTTTATTGGAGATGGTGCAAAACTT
GTGAGGGACGCGTTCCAGCTAGCAAAGGAAAAAGCTCCCTGTATCATCTTCATTGATGAAGTAGATGCAATTGGTACTAAGCGTTTTGACAGTGAAGTAA
GTGGAGATCGTGAAGTGCAGAGAACTATGCTGGAGTTGCTTAATCAGCTGGATGGATTCAGCAGTGATGAGCGCATTAAAGTTATAGCAGCCACGAATAG
AGCAGATATTTTAGATCCTGCACTGATGCGGTCAGGACGTATAGATAGAAAAATTGAGTTCCCTCATCCAACCGAGGAGGCACGGGCACGTATCTTGCAG
ATTCATTCGAGGAAAATGAATTTAAGGCCTGATGTCAACTTTGAGGAGTTGGCTCGCTCAACAGATGACTTTAACGGAGCTCAATTGAAGGCTGTGTGTA
TTGAGGCCGGAATGTTGGCGCTTCGCCGTGATGCCACGGAAATAACTCACGAAGACTTCAACGAGGGTATTACTCAAGTACAAGCGAAAAAAAAAGCCAG
TCTTAACTACTACGCTTAATCACTCTCTCCTAGTAGACTCCAGGATTAAATATATGCCCTGATATTCCCAAAAGAGTCTGGAAGGCAATAGATGAACTGG
CATTTTTACCTTGCCTTGTAAATGATACTGCGATATGTTTAGATACATTGCTGTTGTATTCAAACACTCAATATTCTTTTGTGCCTTATTAAGACCAATC
TTATTTTGATAAGCTGTACGGGGACCTGTTTACTGACTTTGGTCAATTTTATTCTGGTCCTTGTTGGTATGTAACAGAAGCGACAGTTTCTCATGGCCTA
ATAGGGTTCACTGGAAAATTCCGAAGTCTGCACTCAATCTAGCTCAATTATTGTACCTGAAGAGTATTTAATGAGGTGGGATAAGGAG
AGTCGCAAGGGGACGCCGCGCTCACTACTCCCTCCCACTCCCGCCTCCGCTCGCAGGCTAGCTCCCCACCACCTCTCAAACTGCTCTCGCTGCTTTCCTA
GTGTTGCCATTATCATTGGGATGAAGTGTGCACAGGAATGACGAGGAGGAGGAGGAGGATAAGGAGGATGAGGAGGTGGGTTTGTTTCTGGTGAGGTGAG
AGTGTCGACTGAACGGGGGTGGAGGAATTTGACGTGATTCGGGGGTCCAGTCTCAAGGATAGTATCGAAATATATTGGTGCTGAGGGCAGGGAGTTGCGG
GTTTTGGGGATTTCATATCTAAACGGCGTTGATAGCTGGAATTGGTCGTCCCTTGGTACAGGTCCGCAATGCTGGATGTTTGACGCAGTGGTGGAGTGCG
GACTGAATTTCGCCTACTTTTGCATCTGGGCTGGATAGTTGGGGTGCGTTTCAGGCGGTGGATGCGTAGGGATCGCGATCTCTTTGGAATAGTTCTCTTG
ATAACCTACTCGTTTGTGGAGAAGCCCCTGGGTTTGGCCTCGCCCGACACATATGCATGAACTTCCTGGCACTCGATCTGCATTCCCGTAGACGTTGAAG
GAGGTTTGAGACAAGGGAGAAAGCAGAGTTTGGGAGGCTTACGTACTTCATCTCACGCTTCTTGTGGAACAGGTCTTTTTCACTAGTGTCTCCCACTTCG
TTCGTATTTAGATCGACATATTTGTTGCCCAAACTTCAGGCTAATTTTCATCAGCGCCAGTTGTCCAATCTCAGAGTCATGCGGCAATGCAGTTGTGCTT
GTCAGTGGTTTCGAGGCAACATTTAAAGCTTTAACACAAATTCGGATTCTCTCAATGCTACCGCTCACCAAAAGGAGCCGGAAGAATAATACAGAAATGT
AGGAGTCGTGGTTGTTTTGGAGAACTTAATCTGGGCCTCTACTTAATGCGTATCTGCACAAGCTTTACGTTTACAACTTTAGAGTGACAGGTTCTGGCGT
TTTCTGTACTTGTCGATGGTTTGGGTTCACCTCATGACTTCGGTTCTTGGTGATTTTTTCTCTGTCACGCGAACAATTCTGAATGTAGCTGAAAGTGTCT
CATTACCTTCAGCTTTCCTGAAAGAACAACGTGCTTTTGATTAAGAACAGCCAGTCGAATGGTCACGAGGATTGGAGCTGAGAATCGCTGTGATATAGAG
CACATGATCCACACCAAGAGATTAGTGGGAGCTGTGGACCCCAACCGTAAGCAAAGGGTACACAATGCCGGCTCTGACGGCCTCGGGGAGCATTGAACGA
CTCGACATACTCAATTTCAAGTCGCACAAGTGTCACCAGATAATTGGCCCATTCAGTGATTTTGCAGCAATTGTGAGTGCCAATGGAGCAGGTAGAAGCC
ATCTGGTGGAGGCCATCAGTTTTGTTCTGGGAGTGCGGTCGTTTCAGCTGCGGGGAGTGGTGCAGAGGGCCGGCTTGGACGACAGGGAGTTCGGGGAATC
GAGGGGGAAGATTGCATTTGTGAAGCTGGTTTACCGCACCGCAAGCGGCGAGGAAATAAAGTTTGGGAGAGCGATTACGGGCAGTGGCACGAGCGAATAC
CGCATCAACAACATACCCGTGACATGGGAAATCTACAACAACACGATGAAGGGCCTGGACATTCTTGGAGAAGTTGACTCGGATGGGTCCAGGGAATTTA
AGGAGCCGGGTTCCGAGCCTCAGCCCGCGTCAGTTCCGGACGAGCTGAAGAAGATTCACGTGGAACTAGAGATAGAGAAGGCACGTTCGGAGGAGAAGAT
CCCCGCTCATCAGAAGAGAAAGATGTTCGCTGCAGAGAGGAAGCAGAAGAAGGAACAGAAAGAGTCGGAGGCGGAGAAGCAACTTAGACATCAGAAAGAG
CTTGATGAGAGAGCTGCTGAGGTGAGAATGGAGATGGAATGGTTAGCATCTGCGGGCAGTGAGAGAGCAAATTCCGACTTCGAGGCATTGGGTTTGGAGT
ACGAGAGTCTCCGCGAGCAAGGAAAGTGGATAGAAGAAGAGGCACTGAAAGTGAAAGCGGCTCGGAAGGCTGCAATTGAAGCTTCGGACTTGTGGAAGGC
TTCGAATCGGCCGAGCTCTCGGCCGGCATCTCCCATGCCCATGTCGAAAGAGGATGATGCCGCTTCGGACGCGTCCAGTGCGACCAAAGCTGCAGATTTC
ACTAGCTCCAAGTCTCGCCCAAATGACGTCAAGAATGCGAAGGGCAGGAACGAGATGATGGGTCTTCCAGTAGTCAGCATCTCTTCGAAAGGCACTTATA
ACGATCACAGGATCGAAGAGCTGAACAGGGAATACAGAGAACTTGTTGAATACCAGTCGCAGAACAGAGATGGAAATGGAGCAGAGGCGTCACTAGAATT
GGAAAACAAGCACAATGAAAGTGGGTATTCAGGACTAGAGGCTGAGGAAAAAGTCGGCCATGGAAGGCCCGCGCATGCGGAAGGGTCTACATGGGCGGAT
GGTAGCGCTCGTGATGCGCAAGCTTCGCAACGACTGAAAGATTACGATGGTCAGATGTGGGGGTGTGAGGCAGAAGAGGATGAAATGGATCCGGACAAAG
ACAGCCTGAGCAAAGCGGAAATTCTGGCGGAGGAGTTGTATAGAGATGCTATGGAGCTGCACGACAGATTGGTCGCGGAAGCGGAGATAAACGCCGGTGT
TGGCATTTGTGGGGTTGATGGGAAAGGTCACAGTTGGATCGCGGAGACGAAAGAGACATGTGGTGCCATAATGTATGCAAACAATCACGCTCAGAATGGG
AGGTGTGGAACGATGGGCGAAGATAGTGGGTTGAATTCGGCGGGGAGCAGCGAATCGAGGTCCCTGTCTTTCTCGCAAACGTCACAAAGCAGTGACTTAG
CGAAGGGTGAAAGCAGGAATGGTGGCGATCACGCGATGGCCTCTATGGTGGAGTTCAAGGGTGGAGAGAACGGAGGTAGTCCTAGGAGTGCCTTGGAGAA
GGAGATGGCGAGGCTGAGGGGGAGCAACATGAGGAAGCAGCTGAAGATTGATTCGTTACAGAAGTGGAAGGCATATTACAAGTTGGAGTTGGAAGACAGG
GAGCGGAAGTTGAGACAGATCGAGGAACGATACAGGCGGGAGCTGAAGAAAAGGGAGAAAGCCGTGCAGAAGGTGGTGAAGGCACACGCGAAGGACATCG
CAGTGCGAGAATCCAAGCAGGAGGGGATGGAAGAGAAGCTGAGAGGGGAGATCAAGGAGCTGAACCGGGTGGTGGAGGAGCTGAGCGAACAGTTATACGA
GATGGAGGAGCACCTGGCATCGCGGGGAATCCCCTACAAGCCTTCCGTGAACGAGAGCACAGGGCCGTCTTCCAAGACTCTTCTATCTGCGGTGATTGGC
GTGAAGGAGGCTGCGCACACTTTCTCTCGGACGTTCATGTCGCACCTTAAGCAGCATTTGACGAAAGCTCGGGATCTGGACGAGCAGATCTGTTTGGAGT
CGGAGGTGATCGTGGCGAGGCCGTCGGACTATAAGTTCTTGGTTCAGTCGTTCATCTTGCGGCGGATGTTCTTAGACTTCGACAGCGAATGCTTCAACAT
AGAGAGTTGCATGACCGAGATCTTCGACATCGAGGAGCACTCGAAGTCGTGCTTTCAGGAGTACTTGAAGTACAGGACGGTCTCCGAGACGGTAACACTG
CTGACGGACAATCGGGCGCACAGCGGTTTCCTTCGCGAGTTCTGTTTCAAGAAGTTCTTGCACATAGTGAGCGAGTCGACGGAGGAGGCGTTCTTTGGAG
ACTTCAACCACAGCGACGAAATCTGTGCGGGTCGACACCCGTCGAGCCGGTTTTACGAGAGTTACTTGAAGCTGGCGGTGTCAGTGTGGCTGCTGCATAG
ATTGGCGTTCTCGTTTCAGCCACCAGCGAGGATGCTATCGGTGCGGAAGGGCTCGCAGTTCAACCCGACGTACATGGAGTCCGCGGTGCCTGGGATTTCA
AATGGCGAGATTGTTGTGGAGGGGGAGGGAGGTGCACTTCCGTTCGAGGCACTGGTGGGGCTGATGGTTCATCCGGGTTTCCGATGCGGCAGCAGCATCA
TTCCAGCGCAAGTGTATTTGGTGACCACATGAATTAGTAGCGGGTCTGATGAAGTTGCCGTCGCGATTTTTGCAGAATGCGGGCTTGCTAAGCAAGTCCA
GAACCACGAGCCTCCGAACCAATTATATGACAAAAGCTCACACATATCACGCCTTGCGCCGGTCAAGTCCACGAATCAGTGACGCAGCACGCATGCGCGG
TAGGGGAGTAGGGTGGTGGCGCCTTGACTCCGTTCCACACATGACTGCAATGTCTAGAAATGAGCGCGTCATGGCCAAACTGGCAGTGGTTCTTCAATTT
CTGAATAGCCTGTAGACTCCACCAACCTTGTGGCCGCAATGCGAGGTGCTGTATCGTATGCTTTACAGACAAGCGCTCAACATGCAATCGGGGATAGCTA
GCTGCCTGTTAGACGAGCGAACCTGCGTTGTGGGGGCCAAGCATTTGGCTCTTGCTTTCCTATGGACAAAGCACGGCGTACCCAAGTGCTTTAGCGGATG
CACGCGGTGGATGCGAAGCTCGCTTCATCGTTCTGATCTAGCGTATCGCTCTGTGATGAGACAAGTCGGTGACAGTCAAGTCGTTAGTTTTGGAGGCTTC
CAAGGCGCCGCAATCTGCCACACTGCTCTCCGTTTTATAACTGCAAATCCTACTCGAAGTTAAGATTTGTTGTGGAGGTTTCGCCGAGATCCGGTGCTCA
ATAATTGGATGACAGTGGCAGTGGTTGCGAAGCGGATTCTGAGTTATGTCGGTGACAAGATCTGTCAACCTTTGTAAAAGACTGCCACCGACTTGTCTCA
TCACAGAATTTAGTCAAGAAGTAGATTTCTTATCCGGATGTACTCTATTATTTATATATTTTTTAAAAATTACTCACATTACTCACATTGTAGTTTCTCA
TAAGAGTTTAAATTTTGTAGAATCCAAG
>sly
ATGGAGGCGGCGGCAGCAACAGCGGAATCTGTTCAATGCTTCGGGAGGAAGAAGACAGCTGTAGCAGTAACCCACTGCAAACGCGGTAAAGGTTTGATCA
AGATCAACGGTGTACCTATCGAGCTAGTTCAGCCAGAGATTCTGAGGTACAAGGCTTATGAACCTATTTTGCTTTTAGGACGACATCGTTTTGCTGGTGT
AGACATGAGGATCCGTGTGAAAGGTGGAGGTCACACGTCACAAATCTATGCAATTCGTCAGTCAATAGCGAAAGCACTTGTTGCATTTTACCAGAAGTAT
GTTGATGAGCAGTCGAAGAAGGAGATTAAGGATATACTTGTGCGATATGATAGGACTTTGCTTGTTGCTGATCCTAGACGATGTGAGCCTAAGAAGTTTG
GTGGTCGTGGTGCCCGTTCTAGGTTCCAGAAATCTTACCGTTAA
CGCACTCCAGCCATCGCCCGTCGATAAAAAGTGTGTCTACTAATTTCACTAACCCTAGCATTCTCCCTTTCTCTCTCTACACCTCACCTTTCTCTCTCTA
TAGACCAAACCCTATCAACGCCATGGCGTCACGGAGGCTTATGGCCTCTCTCCTCCGATCAACCGCCCAGCGTGGCGGCGCTATTTCCAGATCTCCATTG
GCAAATTCCATCCCTAAAGCTACTTCACGCGCCTCCCCAGCGGGATTCCTCTTAAATCGTGCTGTTAAGTACGCTACCTCAGCTGCTGCTCCGGCTGATA
AGTCAGCGACACCTCCTAAGTCCTCTGGTAATGAGCCTACCGGTAAGATCACCGATGAGTTCACTGGCGCTGGTGCGGTCGGTAAAGTGTGCCAGGTTAT
TGGTGCTGTTGTGGATGTGAGATTCGATGAAGGTTTGCCTCCGATCCTTACTGCTCTTGAGGTTCTGGATAACCAGATCCGTCTTGTGCTTGAGGTTGCT
CAGCATTTGGGTGAGAATATGGTTAGGACTATTGCTATGGATGGTACTGAAGGTCTTGTGCGTGGTCAACGCGTCCTTAACACTGGGTCTCCTATCACTG
TCCCTGTCGGTAGGTCCACCCTTGGCCGTATCATGAATGTTATTGGAGAGCCTATTGATGAGAGAGGCGACATTACAACCGATCACTTTTTGCCAATTCA
TCGTGAAGCTCCTGCCTTTGTTGAGCAGGCAACTGAACAACAAATTCTTGTTACTGGTATCAAGGTTGTTGATCTTCTTGCCCCTTACCAAAGGGGAGGA
AAGATTGGGCTTTTTGGTGGTGCTGGTGTGGGAAAGACCGTGCTCATTATGGAACTGATTAACAACGTTGCAAAGGCACATGGTGGTTTCTCCGTCTTTG
CTGGTGTTGGTGAACGTACTCGTGAGGGCAATGATTTGTACAGGGAAATGATTGAAAGTGGTGTTATTAAGCTAGGTGAAAAGCAAAGTGAAAGCAAGTG
CGCTCTTGTATATGGTCAAATGAATGAGCCCCCTGGTGCTCGTGCCCGTGTTGGCCTTACAGGATTGACTGTGGCTGAGCACTTCAGAGATGCTGAGGGG
CAGGATGTGCTTCTCTTTATTGACAACATTTTCAGATTTACCCAGGCTAACTCAGAGGTCTCTGCTTTGCTTGGTCGTATCCCATCTGCTGTCGGTTATC
AACCAACTTTGGCTACAGATCTTGGAGGTCTTCAAGAGCGTATCACTACAACCAAGAAAGGTTCTATTACATCTGTCCAGGCTATCTATGTGCCTGCTGA
TGACTTGACAGATCCTGCCCCTGCAACTACCTTTGCTCACTTGGATGCCACGACTGTGTTGTCCCGTCAAATTTCTGAGCTTGGTATTTATCCTGCTGTT
GATCCACTTGATTCTACATCTCGTATGCTCTCACCTCACATTTTGGGAGAAGATCATTACAATACTGCTCGTGGGGTACAGAAAGTTCTTCAAAACTACA
AGAATCTTCAAGATATTATTGCCATTTTGGGTATGGATGAGCTGAGTGAAGATGATAAGATGACTGTTGCCCGTGCACGTAAGATCCAGAGATTCCTCAG
TCAGCCTTTCCATGTTGCTGAAGTTTTCACGGGTGCTCCTGGAAAATATGTTGACTTGAAGGAGAGCATTAACAGTTTCCAGGGAGTCCTGGACGGGAAA
TACGATGATCTTTCAGAACAATCATTCTATATGGTCGGTGGAATCGAGGAGGTCATTGCCAAGGCAGAGAAGATTGCCAAGGAATCTGCAGCTTAGATTA
TTAACTCCAGCAACTTTCTTTCATTATCTTCATCGATAACTACAGAAATAATTTAAGTTTCTGTGACACTGGATTTTTTTTTCCTGGGAGGACTAAGGGG
TCCAAGATTTTCTGGTTTTTGTTTTTATATTCAACCCGGAATTGTGATAGGGAAGACATGGAGCTAAGGCCTACTTGCCAAACACCCACCCTTGACGCTC
TGTTATGTCGCATAATAAAGGGGGTAAAACGGCAAACTTGTATATTTTACTTTGAATTCATCTTGAGAATGTTGGTTGCCCAAATTATGAGGGATCGTCG
TCTTTTCATT
ATGTCGAGACCGGAACTCCTAGCACCGCCGGAAATTTTCTACAACGACGATGAAGCTAGAAAATATACCTCATCTTCTCGAATTATTGACATACAGACAC
AACTTACAGAGAGAGCATTGGAGCTCCTTGCTTTACCTGATGACGGCGTCCCGAGATTACTTCTTGATATTGGTTGCGGATCAGGTCTAAGTGGGGAGAC
ACTCACTGAGCAGGGACACCAGTGGCTTGGTTTGGATATATCAGAATCAATGCTTGATGTTGCATTGGAGCGTGAGGTTGAGGGTGATTTGATGCTGGGT
GACATGGGTCAGGGCTTAGGGCTTCGATCTGGTATTCTGGATGGTGCCATCAGTATCTCAGCTGTGCAGTGGTTGTGCAATGCTGACAAATCTTGTCATG
AACCTCGGATAAGATTGAAGGCTTTCTTTAGTTCCCTGTACAGATGTTTGGGAAGGGGAGCAAGAGCAGTACTCCAGATCTATCCTGAAAATCTTGCTCA
GAGAGAGCTAATTCTGGGTTTTGCCATGCGAGCTGGATTTTCTGGAGGCATAGTTGTTGACTACCCACACAGTTCTAAAAGGAGGAAGGAATACTTAGTT
CTTACTTGTGGTCCGCCGTCTCTCAGTACCACTACTCCTGAAGGAAAGGGTGAAGATGGAGAGAGTTGTTCTGATGAAGATAGTAGCGAGGATGAAGAAA
ACCAGACAGTTTGCATATCTGACAGGCGCAGGCCTAGAAAAAAGCAAAAGGTTAACAAGAAAGGCAAAGGGAGGGACTGGGTTCTGAGGAAGAAAGAACA
GATGAGGAAAAAGGGGAATGCAGTTCCTGCAGATAGCAAATACACTGCACGTAAAAGAAAAGATCGGTTTTGATCCATTAGTAAGATATATTCGGGTTGA
TTTATATGTTTTCAACAGAACTTCAGCACAAGGAGCTAAAATTATTGCTTATTGACCGAAGTGAGAAGCAAAAATATTCTGATTAAAGACGTTCCTCAGA
TTGTTTAAAGATTCCGGGACAGTTTTGTGAGACCTGAATATAATTTTTCAGCTGAGTTCAAGAGTAAACAAGATGGTCTATAGTCTCTTGGTTCTTTACA
TATGATTTTTTTTTAATTGGAGGTTGTTTTTCGATAGATCACGTTGTGTATTTAACCCCCTTCTGGAGTTTATCACTGGTTGAGTACTTATTTTCTTATG
CAGTTGAAATTGTGTTCATTTATCT
GGCATCGAAAAAGAAGAGAATATAAAGCTTTCCGACTATACAAGGTTACACAGATCGACTCCACTCCAATTTCATTTCGGAATCCCATACAAACAATCTT
GTCGACGATGGCAACGCCGATGGCTGAGGATAGCAACTTCGAAGATGACCAGCTCCATGCTATGTCCACTGAAGATATTATTAGGGCTTCTCGCCTTCTT
GACAATGAAATTCGAATCATAAAGGAAGAGCTGCAGAGGACGAATCTAGAGTTGGATTCATTCAAGGAGAAGATAAAGGAGAACCAAGAAAAAATTAAGC
TCAATAAGCAACTTCCTTACTTGGTCGGCAACATTGTTGAGATTTTGGAAATGAATCCTGAAGAAGAAGCTGAGGAGGATGGTGCAAATATTGATCTCGA
CTCACAAAGGAAGGGCAAGTGTGTTGTACTGAAAACATCCACACGCCAGACAATTTTCTTGCCTGTTGTTGGTCTTGTTGATCCTGACAACTTAAAACCT
GGTGATCTGGTTGGAGTAAATAAAGACAGTTATTTGATATTGGACACCTTGCCATCTGAATATGATTCTCGGGTAAAGGCAATGGAAGTTGATGAAAAGC
CAACTGAAGACTACAATGATATTGGAGGCTTGGAGAAACAGATTCAAGAACTTGTCGAGGCAATTGTGCTGCCTATGACACACCAAGAACGGTTCCAGAA
ATTAGGTGTTCGTCCTCCAAAGGGAGTCCTTTTGTATGGGCCTCCTGGGACTGGGAAAACCCTGATGGCCAGAGCCTGTGCTGCACAAACAAATGCTACT
TTTCTCAAGTTAGCGGGACCTCAGCTTGTGCAGATGTTCATTGGAGATGGAGCAAAACTTGTTCGTGATGCTTTCCAGCTGGCAAAAGAGAAATCACCTT
GCATAATTTTCATTGATGAAATTGATGCTATAGGCACAAAGCGTTTTGATAGCGAAGTTAGTGGGGATCGAGAGGTCCAACGAACTATGTTGGAGTTACT
TAACCAGCTCGATGGTTTTAGCAGCGATGATCGGATTAAGGTGATAGCAGCAACAAACAGAGCTGATATTTTGGATCCTGCTTTGATGCGATCTGGTCGT
TTGGATCGTAAAATCGAATTCCCCCACCCCACAGAGGAAGCCAGGGCTCGGATCCTGCAGATCCATTCCAGAAAGATGAATGTCAACCCAGATGTTAACT
TTGAAGAATTGGCTCGGTCGACAGATGATTTTAATGGGGCACAGTTGAAAGCTGTATGTGTTGAGGCAGGCATGCTAGCACTCCGTCGCGATGCCACTGA
GGTAACTCATGAAGACTTCAATGAAGGTATCATTCAAGTTCAAGCCAAGAAGAAAGCCAGCTTAAACTACTATGCCTAAACTTTCTGCAGGCCCCATGGC
AAGCAGCTTTTAGCTTTTCGAAGTTGAAGATGGCTACTGCCTGCCACACCCCCGAACTCCTTTTAGTATCCCTCTTCTTTCTTTCTGTGCGGGTAGGGGG
TGGGGATAGAAGCTTTGCACATTAGCGTCTGTTCTGTGGATTACTGATATCAAAGGAGGTGTCTGGTAGTATGTGGATCTCTTCTTGAATTTGTTCAGCT
GTATACTTTCCTGCTGTATGACTTAATGACCTAGAATAGCCTTGTGCTATATTGGCAATCGAAACTTTATCGTTAATTTTGGACAATAGCT
GGCATCGAAAAAGAAGAGAATATAAAGCTTTCCGACTATACAAGGTTACACAGATCGACTCCACTCCAATTTCATTTCGGAATCCCATACAAACAATCTT
GTCGACGATGGCAACGCCGATGGCTGAGGATAGCAACTTCGAAGATGACCAGCTCCATGCTATGTCCACTGAAGATATTATTAGGGCTTCTCGCCTTCTT
GACAATGAAATTCGAATCATAAAGGAAGAGCTGCAGAGGACGAATCTAGAGTTGGATTCATTCAAGGAGAAGATAAAGGAGAACCAAGAAAAAATTAAGC
TCAATAAGCAACTTCCTTACTTGGTCGGCAACATTGTTGAGATTTTGGAAATGAATCCTGAAGAAGAAGCTGAGGAGGATGGTGCAAATATTGATCTCGA
CTCACAAAGGAAGGGCAAGTGTGTTGTACTGAAAACATCCACACGCCAGACAATTTTCTTGCCTGTTGTTGGTCTTGTTGATCCTGACAACTTAAAACCT
GGTGATCTGGTTGGAGTAAATAAAGACAGTTATTTGATATTGGACACCTTGCCATCTGAATATGATTCTCGGGTAAAGGCAATGGAAGTTGATGAAAAGC
CAACTGAAGACTACAATGATATTGGAGGCTTGGAGAAACAGATTCAAGAACTTGTCGAGGCAATTGTGCTGCCTATGACACACCAAGAACGGTTCCAGAA
ATTAGGTGTTCGTCCTCCAAAGGGAGTCCTTTTGTATGGGCCTCCTGGGACTGGGAAAACCCTGATGGCCAGAGCCTGTGCTGCACAAACAAATGCTACT
TTTCTCAAGTTAGCGGGACCTCAGCTTGTGCAGATGTTCATTGGAGATGGAGCAAAACTTGTTCGTGATGCTTTCCAGCTGGCAAAAGAGAAATCACCTT
GCATAATTTTCATTGATGAAATTGATGCTATAGGCACAAAGCGTTTTGATAGCGAAGTTAGTGGGGATCGAGAGGTCCAACGAACTATGTTGGAGTTACT
TAACCAGCTCGATGGTTTTAGCAGCGATGATCGGATTAAGGTGATAGCAGCAACAAACAGAGCTGATATTTTGGATCCTGCTTTGATGCGATCTGGTCGT
TTGGATCGTAAAATCGAATTCCCCCACCCCACAGAGGAAGCCAGGGCTCGGATCCTGCAGATCCATTCCAGAAAGATGAATGTCAACCCAGATGTTAACT
TTGAAGAATTGGCTCGGTCGACAGATGATTTTAATGGGGCACAGTTGAAAGCTGTATGTGTTGAGGCAGGCATGCTAGCACTCCGTCGCGATGCCACTGA
GGTAACTCATGAAGACTTCAATGAAGGTATCATTCAAGTTCAAGCCAAGAAGAAAGCCAGCTTAAACTACTATGCCTAAACTTTCTGCAGGCCCCATGGC
AAGCAGCTTTTAGCTTTTCGAAGTTGAAGATGGCTACTGCCTGCCACACCCCCGAACTCCTTTTAGTATCCCTCTTCTTTCTTTCTGTGCGGGTAGGGGG
TGGGGATAGAAGCTTTGCACATTAGCGTCTGTTCTGTGGATTACTGATATCAAAGGAGGTGTCTGGTAGTATGTGGATCTCTTCTTGAATTTGTTCAGCT
GTATACTTTCCTGCTGTATGACTTAATGACCTAGAATAGCCTTGTGCTATATTGGCAATCGAAACTTTATCGTTAATTTTGGACAATAGCT
TATAATTCGATTTTTCCCTCTCATTCGTCTTTTATACTCTTCCAATATGGGAACCCGACTCCAGCTCCGACTCCGACGCTCCATGAGTTAAAACAAGATA
AATACCCGCCAAAACAAAAATCCCCTCACTTCAAACCCTAATTTCACTCTCCATCAACTCAATTCAAGTTTCATATTCACCATTTCATCACAAAATTCTC
ACCCAATACCTAGGGTTTCGACTCAGCAATGCCGTCACAGGCGTCGCCGGGAAAAATCCACCGGCTGGAACTCGAGAATTTCAAGTCCTACAAAGGATTT
CAAACAATTGGCCCATTTTACGACTTTACAGCGATTATAGGGCCAAATGGAGCAGGAAAATCTAACCTGATGGATGCAATCAGCTTCGTCCTTGGAGTTC
GTACGGGTCAACTTCGAGGTGCACAGTTGAAGGACTTAATTTATGCTTTTGACGACCGTGAAAAGGAGCAGAGAGGTCGAAGAGCTTTCGTGAGGCTAAT
TTATCAGCTTGCTAATGGTACGGAAATTCAGTTTACGCGTGCTATTACGAGTGCTGGTGCGAGTGAGTATCGGATTGATGGGAAAGCTGTTAATTGGGAT
GAGTATAATGCCAAATTGAAGTCTCTTGATATTCTGGTTAAAGCACGGAATTTTCTCGTCTTTCAGGGTGACGTTGAGTCTATTGCATCTAAAAATCCAA
AAGAACTCTCTGCACTCCTTGAGCAAATATCTGGATCTGAAGAGTTCAAGAGACGCTATGATGAATTGGAAGAAGAAAAAGCAAGAGCTGAAGAAAAGAA
GGCACTTGCTTACCAGAAAAAGAAAACTGTAACTATGGAGCGAAAACAGAAAAAGGAACAGAAAGAAGAAGCTGAGAAGCATCTTCGTTTACAAGATAAA
CTGAAATCTTTGAAGCAAGAATATTTTCTGTGGCAATTATTCAACATAGAAAAGGATATTGCTAAGACAAACGAGGAACTTGATGCTGAAGAAGCAAGAG
TCAAAGAAATTGTGGAGAAACTTGGGGAATATGAAAGTGAATCTAGCAAAAAGAAGAAAGAACTAAGCGGATACATGAGAGAGATTGCATTGCGCGAGAG
GAAGATTGCAGATAGAAAAAACAAACTTGACAAGAATCAACCTGATTTAGTAAAGTTAAAGGAAGAAATATCGCGGATTACTTCAAAAATCAGAAGTACA
AGTAAAGAGCTTGATAAGAAGAGAGAAGAAAAAAGAAGACATGCAGATGAGGTGAAGAAGCTTCAAAATGACTTGAAGGACATTACAAAGCAGCTGGACG
AGTTGCGTCAAAGAAGTCGAGATGCAGGGGGGAAACTTCAATTAGCTGACAGTCAATTGGAGACATATCACCAAATTAAAGAGGAGGCCGGCATGAAAAC
TGCGAAACTAAGAGATGAGAAAGAGGTCTTGGATAGGCAGCAGCGTGCTGATATTGATGCTCAGAAGAATCTGGAACAAAATCTTCAGCAGCTTGAAAAT
CGGAAGCATGAGCTTGAGTCTCAGGAGAAACAGATGCAAACAAGGTTGAAGAAAATTCTTGATGCAGTTAAGAAGCATGATGAAGAACTGAAACGGGTGA
AAGAAGAACAGCGTGAGATGAAAAATAAACTTCGACGCTCCAGAGAAAAACATGACAATCTGCGCAAACGACTTGATGAAGTAGAGGACCAACTACGCGA
GTTGAAGGCTGAGAGACATGAGAATGAGAGAGATGCCAGATTGTCTCAAGCAGTTGAAACACTGAAGCGTCTGTTTCCCGGTGTTCATGGTCGAATGACA
GATCTCTGCAGGCCAATACAGAAGAAGTATAACCTTGCTGTAACAGTTGCAATGGGCAGATATATGGATGCAGTAGTAGTTGAGGATGAACAAACAGGAA
AAGAATGCATCAAGTATCTGAAAGAGCAAAGACTTCCTCCTCAGACATTTATACCTCTTCAGTCGGTCCGTATAAAGCCAGTAGTTGAGCGGTTGCGGAC
ATTGGGTGGGAGTGCTCAGCTGGTTTTTGATGTTATACAATTTGATCAAGCACTGGAGAAGGCTATATTATTTGCTGTTCAGAATACCATTGTTTGCAAT
GACTTAAAAGAAGCTAAGTATCTTAGCTGGGATGGTGATAGACTTAAAGTTGTGACTCTTGATGGGATTTTGTTAACAAAATCTGGTACTATGACTGGTG
GTACTAGTGGTGGAATGGAAGCACGATCTCACAAATGGGATGACAAAAAAATTGACGTGCTTAAGAAGAAAAAAGAAGGTCTCGAGTCAGAGTTGGAGGA
GCTTGGATCAATAAGGGAGATGCAGCTTAAGGAGTCTGAAGCATCTGGCAGAATCAGTGGACTTGAGAAAAAGATTCACTATGCTGAGATTGAAAAGAAA
AGTATTGCAGACAAACTTCAAAATTTGGAACGCGAAAAGGGGAGTATTGAAAATGAAATTAGACATATCCAGCCTGAACTTGAGCAGTTGAACAGAAAAA
TAGATGCAAGGGCACAAGAGATCTTATCACGAGAGAAAAGGATCAATGACATTGTTGACAGAATCTACAAAAAGTTCAGTGAATCTGTTGGGGTGAGAAA
TATTAGGGAGTATGAAGAAAATCAGCTCAAAGCTGTTCAGGAAATGTCTGAAGAAAGGCTCAATTTACATAATCAACAATCGAAGCTTAAGTCACAGTTG
GAATATGAGCAGAAGCGGGACATGGATTCACGAATTGTAAAACTGGAATCTACCCTTAATAACTCAAAAGAGAAATTAAAGGAGGTTGAGACCAAGGAGT
CGGATCTGAAGTCGTCCATGGAGAAAGCTACAAAGGAGATAGACGATTACAAGGAAGAAGTATTTGCATGGAGGTCCAAATCAGAAGAATGTGAAAAGCA
GCTGCAGGAGTGGCAGAAAAAGATCTCTGCTGAAACAACTAGCATTAGCAAACATAACCGTCAAATTAAATCAAAGGAGGCACAGATTGAACAACTGAAT
TCAAAAAAACAGGAAATATTGGAGAAATGTGAACTGGAGCAAATAGAACTGCCCACTATCTCTGATCCAATGGATACTGGAGAGTCTACACCTGGCCCTG
TTTTTGATTTCAGTAAACTGAGTAGAACATATCAGCAGATTACGAAGCCCACTGAAAGGGAGAAACATGAGGTGGATTTTACTCAGAAAATTGCTTCCTT
GATGTCGGAGATAGAAAGAACAGCTCCAAATCTGAAGGCCCTTGATCAATACAAAGATTTACTGAAAAAGGAGGAAGATGTTAATAAAGAATTTGAAGTG
GCCAAAAATGAGGAGAAGAAAGTTACTGATGAATATAATAGAGTTAAAGGGGGCAGGTATGAATTGTTTATGAAAGCTTTCAATTATATATCTGGCAAAA
TCGACCAGATATACAAGCAGCTCACAAAGAGCAATACACATCCTCTCGGTGGGACGGCATATCTTAACTTGGATAATGAAGATGAGCCATTTTTACATGG
TATCAAGTATACCGCTATGCCCCCAACAAAACGGTTTCGGGATATGGAACAGCTTTCAGGAGGAGAGAAGACGGTTGCAGCACTTGCATTGCTTTTTGCT
ATCCACAGTTTTAGACCGTCTCCATTCTTCATACTGGATGAAGTTGATGCTGCATTGGATAATCTGAATGTTGCCAAAGTTGCTGGATTCATTCGATCAA
AGTCGTGTGGAGGTGCTAGGCTTACTCAGGATCCTGAAGAAGGATGTGGCTTCCAAAGCATTGTTATCTCTCTGAAAGACAGCTTTTATGACAAAGCTGA
AGCTTTGGTTGGTGTTTACAGGGATGCTGAGAGAGGTTGCTCGAGCACATTGACATTTGATCTGACCAAGTACAGGGAATCGTGAAAGTCCAATCTCTTA
ATTCTCTGGAGATGTAGTTCACCGATGTTTAGATTGTATTTAACTGATCTTTGGTGGGTCGTTAATATAACAGTTCAAATGTAGTGTAGATTGGTATATA
AGTGATCTTGTTACATTATATACATACAGTTGTTTGAAGTTTCACAACGCTCGTATCTAAATGTATTTTACTTGTGATTTTAAGTAGTACATATTGTGGC
TGCTTATTTGCTTTGA
>smoe
ATGGCGGCGGCTATTCAATCCGTGCAGTGTTTTGGCAGGAAGAAGACAGCAGTGGCGGTGACATACTGCAAGAAGGGGCGCGGGCTGATCAAGATCAATG
GCTGCCCGATCGAGCTTGTGGAGCCCGAGATCCTGCGATTCAAGGCGGTGGAGCCGATCCTCCTCCTCGGCCGCGAGCGCTTCGCGGGGGTGGACATGAG
GATCCGCGTGCGCGGCGGAGGCCACACCTCCCAGATTTACGCCATCCGGCAGAGCATCGCCAAGGCGCTGGTGGCCTTCACTCAGAAGTTCGTGGACGAG
CACGCCAAGAAGGAGATCAAGGATCGATTGGTGAGCTACGACAGGACGCTCCTGGTGGCTGATCCCCGGCGCTGCGAGCCTAAGAAGTTTGGAGGCCGCG
GAGCTCGCGCTCGCTTCCAGAAGTCCTACCGTTGA 
CCGGAAGCCCTGGGCTACATTGCTCAGGTGATTGGCGCCGTGGTGGATGTCAAGTTTGACAAGGAGCTGCCATCGATTTTGAACGCTCTCGAGGTCCAGG
ATCACTCCTTTCGCGTCGTGCTCGAGGTCGCCCAGCATCTGGGCGATATGACCGTCAGGACGATCGCCATGGACACTACCGATGGGCTCGTGAGGGGGCA
GAAGGTCTTGAACACCGGAGCTCCCATCACTATTCCCGTTGGGAGGTGCACGCTCGGCAGGATCATGAACGTGATTGGAGAGCCTATCGATGAAATTGGG
GATTTTGTCACTGACCATTATCTCCCAATCCATAGAGAGGCTCCAGTCTTCACTGAGCAGTCCACAGAACAGGAAGTTTTGGTGACGGGAATCAAGGTGG
TGGATCTTCTTGCACCATACCAACGAGGTGGGAAAATCGGACTTTTTGGGGGTGCTGGTGTCGGGAAGACAGTGCTGATTATGGAGCTTATTAACAATAT
TGCTAAGGCTCACGGTGGTTATTCTGTGTTTGCTGGTGTCGGGGAACGCACTCGTGAAGGAAACGATCTCTACAAAGAAATGATTGAAAGTGGTGTCATC
AAGCTGGGTGACAAGCAAAACGAAAGCAAGTGTGCGCTGGTGTACGGGCAGATGAATGAGCCCCCGGGTGCTCGTGCTCGCGTTGGCCTCACAGGATTAA
CCGTGGCAGAGTATTTCCGTGATGCAGAAGGCCAGGACGTGCTACTGTTTATTGATAACATTTTCCGTTTCACTCAGGCAAACTCGGAAGTGTCTGCTCT
GCTGGGACGAATTCCTTCTGCTGTCGGATATCAACCCACTCTGGCAACAGATCTTGGGGGTTTACAAGAAAGAATCACGACTACTAAGAAGGGATCCATC
ACCTCAGTGCAAGCCATCTACGTGCCTGCTGATGATCTAACAGATCCTGCTCCAGCGACGACTTTCGCTCATCTTGATGCAACTACTGTGCTTTCACGCC
AGATTTCCGAGCTTGGTATCTATCCGGCCGTGGATCCTCTTGACTCAACCTCTCGTATGCTGTCTCCTCGTGTCATTGGAGAGGATCATTACCAGTGCGC
TCGTGACGTCCAAAAGGTGTTGCAGAGCTACAAAAACTTACAGGATATCATCGCCATTCTGGGAATGGACGAGCTCAGCGAAGACGACAAGCTCACCGTG
GCTCGGGCTCGGAAGATGCAACGTTTCCTGAGCCAGCCTTTCCATGTTGCGGAGGTTTTCACAGGCTCCCCTGGAAAGTACGTGGACTTGAAGGAGAACG
TCGCGAGTTTTCGGGGTGTTTTGGATGGCAAGTACGATGATTTGCCAGAGCAATCTTTCTACATGGTTGGAGGAATCGATGAAGTGGTCGCAAAGGCTGC
TAACTTGGCTAAGGTTTCCAAGGAGAAGTAAGCAAGTGACAAAGGAGGCGGCTGCTGGAACTCGGTGACGATGATGAACAAAGAAGTTTTTTTGGTGCTT
CTAAGAACTTTGAGCTCGGGGATTTTGGCCGCGAGCTCTAAAACTCCAGGACTCTTGTTGCTTGTGAACGGTTTTGGGATATTCCAATAATGGTAACAAT
AACCCGAGAGAGAGACTTTTGCTGTT
ATGGCGCGGCCAGAGCGCCAGGCGCCTCCGGAGCTCTTCTACAATGAATCCGAGTCGCGAAAATACACGACGTCGTCTCGGATCATCCATATCCAGGCAA
AGCTGACAGAGAGGGCTATGGAGCTTCTCGCTTTGCCTGATGACAAACCAAAGCTTCTTCTTGACATTGGTTGTGGATCGGGCTTGAGTGGAGAAACTTT
GAGCGAGAAAGGTCATCACTGGATAGGAATGGACATTTCACAATCGATGCTAGAAGTTGCTCTAGAACGGGAAGCGGACGGTGATTTACTTCTAGGAGAC
ATAGGACAGGGATTAGGACTACGGCCAGGAGTGTTTGATGGAGCGATCAGCATTTCTGCTGTCCAGTGGCTGTGCAACGCCGATAAGTCGTGCAATGATC
CGCGGAAGAGGCTGAAATGTTTCTTTACGGCGCTCTTCCATTGTCTAGCGAGAGGTGCCAGAGCAGTGCTCCAGATCTATCCCGAGAACACTGCGCAGCT
TGAGTTGATCACATCCGCAGCTATGCGCTGTGGCTTCTCGGGCGGTCTTGTGGTGGATTATCCTCACAGCTCTCGCGCGAAGAAGTATTTTCTCTGTCTG
GTATCTGGGCCTCCCAGCGTACTTCCAAAACCCAAGGGCGAGGACGGAGGAAGCGAAAGTGAAGACAACGAGATTGACGAGGATGATGAAGAAGAAGAAG
ACAATGCAAGAACGGTGAAATTCTCCGGGAGGGAAAGACCCGCAAAGAGAAGCAAGCTCGAGAAGAAGAACAAAAAAGGACGCGATTGGATTCTCCGCAA
GAAAGAACAACGCCGAAAAGCCGGGCATGAAGTTCCCAGAGACACCAAATACACTGGAAGAAAGCGCAAAGCTCGGTTCTAG
ATGGAGGCAGACATCTTCGATGCCGGGGAAGGCGATGAGGCCGGGATGTCGACAGAGGAGATGATCCGGCACACGCGGATCCTTGAGAATGAGGTGCGCG
TTCTCAAGGATGAGGTCCAGCGCGTGACGCTGGAGCTGGATGCAACCAAGGAGAAGATCCGGGAGAACCTAGAGAAGATCAAGCTGAACAAGCAACTGCC
TTACCTCGTCGGGAATGTGGTCGAGATCTTGGATGTAAATCCTGAGGATGAAGCTGAGGAAGACGGTGCCAATGTCGATCTCGATTCTCAAAGAAAAGGA
AAATGCGTCGTGCTCAAGACCTCCACTCGCCAAACAATTTTTCTCCCAGTGGTTGGTTTGGTGGATCCGACCACTCTAAAACCGGGTGACCTTGTGGGTG
TGAACAAGGACAGCTACTTAATCTTGGATACACTTCCGTCCGAGTATGATTCTCGTGTCAAGGCTATGGAAGTCGATGAGAAACCCACAGAGGACTACAG
TGATATTGGAGGGCTTGACAAACAAATTCAAGAGCTGGTCGAAGCAATTGTCCTCCCGATGACACACAAGGAAAGGTTTCAAAATCTGGGCATCAAGCCA
CCGAAAGGAGTTTTGCTCTATGGTCCTCCGGGCACGGGAAAGACTCTCATGGCCAGGGCGTGTGCAGCTCAAACTAATGCAACGTACCTCAAGCTTGCTG
GTCCTCAGCTCGTGCAGATGTTCATCGGAGATGGAGCAAAGCTCGTAAGAGATGCCTTTCAGCTGGCAAAAGAGAAGGCGCCCTGCATCATTTTCATCGA
TGAAGTCGACGCTATTGGGACCAAACGTTTTGATAGTGAAGTTAGCGGTGATCGGGAAGTCCAACGGACCATGCTTGAGCTTTTAAATCAGCTTGATGGT
TTCAGTAGCGACGACCGGATTAAGGTGATCGCAGCAACAAACAGAGCAGATATTCTAGACCCGGCTCTGATGCGATCTGGCCGTCTGGACAGGAAGATCG
AATTTCCTCATCCCACCGAGGATGCCCGAGCGAGAATCTTACAAATTCACTCGAGGAAAATGACTGTGAGCTCCGATGTGAACTTTGAGGAGCTGGCGCG
CTCCACGGACGACTTCAATGGTGCTCAACTAAAGGCCGTGTGCGTGGAAGCTGGAATGCTGGCTTTGAGGCGCGATGCCACGGAGGTTACGCACGAGGAC
TTCAACGATGGCATCATCCAAGTGCAAGCCAAGAAGAAGGCCAGCTTGAACTACTACGCATGA
ATGCCGTCGCTCGTCGCAAATGGGAAAATCCACCGGATCGAGGTTGAGAATTTCAAGTCTTACAAGGGACACCAGGTGATCGGCCCGTTCAAGAATTTCA
CTGCAATTATCGGTCCCAATGGCGCTGGGAAGTCGAATCTCATGGACGCTATCAGCTTCGTGCTGGGCGTCCGATCAATGCAGCTGCGAGGAGCGCAGCT
CAAGGATTTGATCTACGCCTTTGATGACAAGGACCGAGAGCAGAGGGGCCGGAAAGCTTTTGTGAAGCTTATTTACTTGCAAGGAAATGGAGAAGAGCTC
GAGTTCACAAGGGCGATCACTGCTGCTGGGAGTAGCGAGTACCGCATTGACAACAGTGTGGTGACTTGGGAAGAGTATAACAACAAGATGAAGACGCTGG
GGATCCTTGTCAAAGCTCGAAACTTCTTGGTCTTTCAGGGTGATGTGGAATCCATCGCTTCTAAAAATCCCAAGGAACTTACGTCTCTCTTCGAGCAAAT
CTCTGGCTCGGAGGAGCTCAAGAAAGACTACGAAGAATTGGAAGAGCAGAAGACTCGGGCCGAGGAGAAATCGGTGTTCACTTACCAGAAGAAACGGACA
GTAGGAGCGGAAAGAAAGCAAAAAAAGGAACAAAAAGAAGAAGCTGAGAAGCATCTTCGCTTGCAGTCCGAATTGAAAACGTTGAAGACGGAATACTACC
TCTGGCAGATGTTTAATATAGAGAAAGATGTCGAACGGACCCAGGAGGAACTTGATGCTGAGAAGGAGAAGCTAGAGGAAGTACTGAAGGATCAAGAAAA
CGCAGAAAGCGGAGTGAGGGAGAAAAAGAAGGCCCAGGCCACGCTCACCAAGGAAGCGTTGCTCTTGGAGAAGAAAATGACGAAGAAAAAGACGGAACTA
GACAAAAAGGCTAGTTGGAAAAACAAGTTTGTAATGCTTCCAGTGCTGACCAAATTTGTTAATTTTTCAGCATCCAGAGCGCCTGAAACTGAAGGAAGAA
ATGAATAG
>stub
ATGCAGGCGGCACCGGCGACAGTGGAGTCCGTGCAATGTTTCGGGCGGAAGAAGACGGCGGTGGCGGTGACACACTGCAAGCGTGGTCGTGGTTTGATCA
AAATCAACGGAGTTCCTATCGAGCTTGTTCAGCCGGAGATTCTCCGATACAAAGCTTTCGAGCCAATCCTCCTTCTAGGTCGTCAACGATTCGCCGGAGT
TGACATGAGAATCCGCGTGAAAGGAGGAGGTCATACTTCTCAGATCTACGCTATTCGTCAGTCAATTGCAAAGGCTCTTGTTGCTTTCTACCAGAAGTAT
GTTGATGAGCAGACGAAGAAGGAGATTAAGGATATTCTGATTCGATACGATAGGACTTTGCTTGTTGCTGATCCTAGACGTTGTGAGCCTAAGAAGTTTG
GTGGTCGTGGTGCTCGTTCTAGGTTCCAGAAATCTTACCGTTAA
ATGGCGTCACGGAGGCTTATGGCCTCTCTCCTCCGATCAACTGCCCAGCGCGGCGGCGCTATTTCCAGATCTCCATTGGCAAATTCCATCCCCAAAACTA
CTTCACGCGCCTCCCCAGCGGGATTCCTCTTAAATCGTGCTGTTAAGTACGCTACCTCAGCTGCTCCGGCTGATAAGTCAGCGACACCTCCTAAATCCTC
TGGTAATGAGCCTTCCGGTAAGATCACCGATGAGTTCACTGGCGCTGGTTCGGTCGGGAAAGTGTGCCAGGTTATTGGTGCTGTCGTGGATGTGAGATTC
GATGAAGGTTTGCCTCCGATCCTTACTGCTCTTGAGGTTCTGGATAACCAGATCCGTCTTGTGCTTGAGGTTGCTCAGCATTTGGGTGAGAATATGGTTA
GGACTATTGCTATGGATGGTACTGAAGGTCTTGTGCGTGGTCAACGCGTCCTTAACACTGGGTCTCCTATCACTGTCCCTGTTGGTAGGTCCACCCTTGG
CCGTATTATGAATGTCATTGGAGAGCCTATTGATGAGAGAGGCGACATTACAACCGATCACTTCTTGCCAATTCATCGTGAAGCTCCTGCCTTTGTTGAG
CAGGCAACTGAACAAGAAATTCTTGTTACTGGTATCAAGGTTGTTGATCTTCTTGCCCCTTACCAAAGGGGAGGAAAGATTGGGCTTTTTGGTGGTGCTG
GTGTGGGAAAGACCGTGCTTATTATGGAACTGATTAACAACGTTGCAAAGGCACATGGTGGTTTCTCCGTCTTTGCTGGTGTTGGTGAACGCACTCGTGA
GGGCAACGATTTGTACAGGGAAATGATTGAAAGTGGTGTTATTAAGCTTGGTGAAAAGCAAAGTGAAAGCAAGTGCGCTCTTGTATATGGTCAAATGAAT
GAGCCCCCTGGTGCTCGTGCCCGTGTTGGCCTTACAGGATTGACTGTGGCTGAGCACTTCAGAGATGCTGAGGGGCAGGATGTGCTTCTCTTTATTGACA
ACATTTTCAGATTTACCCAGGCTAACTCAGAGGTCTCTGCTTTGCTTGGTCGTATCCCATCTGCTGTCGGTTATCAACCAACTTTGGCTACAGATCTTGG
AGGTCTTCAAGAGCGTATCACTACAACCAAGAAAGGTTCTATTACATCTGTCCAGGCTATCTATGTGCCTGCTGATGACTTGACAGATCCTGCCCCTGCA
ACTACCTTTGCTCACTTGGATGCCACAACTGTGTTGTCCCGTCAAATTTCTGAGCTTGGTATTTATCCTGCTGTTGATCCACTTGATTCTACATCTCGTA
TGCTCTCACCTCACATTTTGGGAGAAGATCATTACAATACTGCTCGTGGGGTACAGAAAGTTCTTCAAAACTACAAGAATCTTCAAGATATTATTGCCAT
TTTGGGTATGGATGAGCTGAGTGAAGATGATAAGATGACTGTTGCCCGTGCACGTAAGATCCAGAGATTCCTCAGTCAGCCTTTCCATGTTGCCGAAGTT
TTCACAGGTGCTCCTGGAAAATATGTTGACTTGAAGGAGAGCATTAACAGTTTCCAGGGAGTCCTGGATGGGAAATACGATGACCTTTCAGAACAATCAT
TCTATATGGTCGGTGGAATCGAGGAGGTCATTGCCAAGGCAGAGAAGATTGCCAAGGAATCTGCAGCTTAG
ATGTCGAGACCGGAACTCCTAGCACCGCCGGAAATTTTCTACAATGACGATGAAGCTAGAAAATATACCTCATCTTCTCGAATTATTGACATACAGACAC
AACTTTCCGAGAGAGCATTGGAGCTTCTTGCTTTACCAGATGATGGCGTCCCAAGATTACTTCTTGATATTGGTTGCGGATCAGGTCTAAGTGGGGAGAC
ACTCACTGAGCATGGACACCAGTGGCTTGGTTTGGATATATCAGAATCAATGCTTGATATTGCATTGGAGCGTGAGGTTGAGGGTGATCTGATGCTGGGT
GACATGGGTCAGGGCTTAGGGCTTCGATCTGGTATTCTGGATGGTGCCATCAGTATCTCAGCTGTGCAGTGGTTGTGCAATGCTGACAAATCTTGTCATG
AACCTCGGATAAGATTGAAGGCTTTCTTTAGTTCCTTGTATAGATGTTTGGGAAGGGGAGCAAGAGCAGTACTCCAGATCTATCCTGAAAATCTTGCTCA
GAGAGAGCTGATTCTGGGTTTTGCCATGCGAGCTGGATTTTCTGGAGGCATAGTTGTTGACTACCCACACAGTTCTAAAAGGAGGAAGGAATACTTAGTT
CTCACTTGTGGTCCACCGTCTCTCAGCACCGCTACTGCCGAAGGAAAGGGTGAAGATGGAGAGAGTTGTTCTGATGAAGACAGTAGCGAAGATGAAGAAA
ACCAGACAGTTTGCATATCTGACAGGCGCAGGCCTAGAAAAAAGCAAAAGGTGAACAAGAAAGGCAAAGGGAGGGACTGGGTTCTGAGGAAGAAAGAACA
GATGAGGAAAAAGGGGAATGCGGTTCCTGCAGATAGCAAATACACTGCACGTAAAAGAAAAGATCGCTTTTGA
ATGGCAACGCCGATGGCTGAGGATAGCAACTTCGAAGATGACCAGCTCCATGCTATGTCCACTGAAGATATTATTAGGGCTTCACGCCTTCTTGACAATG
AAATTCGAATCATAAAGGAAGAGCTGCAGAGGACGAATCTAGAGTTGGATTCATTCAAGGAGAAGATAAAGGAGAACCAAGAAAAAATTAAGCTCAATAA
GCAACTTCCTTACTTGGTCGGCAACATTGTTGAGATTTTGGAAATGAATCCTGAAGAAGAAGCTGAGGAGGATGGTGCAAATATTGATCTCGACTCACAA
AGGAAGGGCAAGTGTGTTGTACTGAAAACATCCACGCGCCAGACAATTTTCTTGCCTGTTGTTGGTCTTGTTGATCCTGACAACTTAAAACCTGGTGATC
TGGTTGGAGTAAATAAAGACAGTTATTTGATATTGGACACCTTGCCATCTGAATATGATTCTCGGGTAAAGGCAATGGAAGTTGATGAAAAGCCAACTGA
AGACTACAATGATATTGGAGGCTTGGAGAAACAGATTCAAGAACTTGTTGAGGCAATTGTGCTGCCTATGACACACCAAGAACGGTTCCAGAAATTAGGT
GTTCGTCCCCCAAAGGGAGTCCTTTTGTATGGGCCTCCTGGGACTGGGAAAACCCTGATGGCTAGAGCCTGTGCTGCACAAACAAATGCTACTTTTCTTA
AGCTAGCGGGACCTCAGCTTGTGCAGATGTTCATTGGAGATGGAGCAAAGCTTGTTCGTGATGCTTTCCAGCTGGCAAAAGAGAAATCACCTTGCATAAT
TTTCATTGATGAGATTGATGCTATAGGCACAAAGCGTTTTGATAGCGAAGTTAGTGGGGATCGAGAGGTCCAACGAACTATGTTGGAGTTACTTAATCAG
CTTGATGGTTTTAGCAGCGATGATCGGATTAAGGTGATAGCAGCAACAAACAGAGCTGATATTTTGGATCCTGCTTTGATGCGATCTGGTCGTTTGGATC
GTAAAATTGAGTTCCCCCACCCCACAGAGGAAGCCAGGGCTCGGATCCTGCAGATCCATTCCAGAAAGATGAATGTTAACCCAGATGTTAACTTTGAAGA
ATTGGCTCGGTCGACAGATGATTTTAATGGGGCACAGTTGAAAGCTGTATGTGTTGAGGCAGGCATGCTAGCACTCCGTCGCGATGCCACTGAGGTAACT
CATGAAGACTTCAATGAAGGTATCATTCAAGTTCAAGCCAAGAAGAAAGCCAGCTTAAACTACTATGCCTAA
ATGGATATTGGAGAGTCTACACCTGGCCCTGTTTTCGATTTCAGTAAACTGAATAGAATGTATCAGCAGATTACGAAACCCGCTGAAAGGGAGAAACGTG
AGGTGGATTTTACTCAGAAAATTGCTTCCTTGATGTCAGAGATAGAAAGAACAGCTCCAAATCTGAAGGCCCTTGATCAATACAAAGATCTACTGAAAAA
AGAGGAAGATGTTAATAAAGAATTTGAAGTGGCCAAAAATGAGGAGAAGAAAGTTACTGATGAATTTAATAGAGTTAAAGGGGCCAGGTGTGAGTTGTTT
ATGAAAGCTTTCAATCACATATCTGGCAAAATCGACAAGATATACAAGCAACTCACAAAGAGCAATACACATCCTCTCGGTGGGACAGCATATCTTAACT
TGGATAATGAAGATGAGCCATTTTTACATGGTATCAAGTATACCGCTATGCCCCCAACAAAACGATTTCGGGATATGGAACAGCTTTCAGGAGGAGAGAA
GACGGTTGCAGCACTTGCATTGCTTTTTGCTATCCACAGTTTTAGACCTTCTCCATTCTTCATACTGGATGAAGTTGATGCTGCATTGGATAATCTGAAT
GTTGCCAAAGTTGCTGGATTCATTCGATCAAAGTCGTGTGGAGGTGCTAGGCTTACTCAGGATCCTGAAGAAGGATGTGGCTTCCAAAGCATTGTTATCT
CTCTCAAAGACAGCTTTTATGACAAAGCTGAAGCTTTGGTTGGTGTTTACAGGGATGCCGAGAGAGGTTGCTCGAGCACATTGACATTTGATCTGACCAA
GTACAGGGAATCGTGA
>zmay
ATAGCCCTGCTAATAAAAAGCTATTAGCTGCTTTTTCGATGATATCTAACGGAACCATTAGTTGATTGATGCCAGTGTAGCACCTAATATGAGCAAAAGC
AGCCAAATAACATACATTGTGCAAATACGCAATACATATGGTGACAAGTGCATTCTAAATGTTTAGCCATGAGGTTAACTAACAATGCAACAGTATGAAT
TAATTTCAAATAGGCAGAAGATTGCAACAGATTGTAGAAGCTAAACTTATCGAGCAAGGGCAATGACTATTGATACTGAAACAGATAATTTAATGACAGA
AGATGTTTACATCAGTAAAATATTTATGCAGCACCATATTAATAGCCCTTATAACAGAGCTGCACGCCTGCACCCGCAATAACAGAGCCACGTAAATCAA
GACAATGATGTGATATAGAATTAGACCCCACTAAGAAAACGATTATGCACAAACAGAAGACAGAGCCATTCAACAAACAACAGATATCTTTTTTATTAAA
AAATACTTCTAATTTTTCGAAAAGAACAAATGAAAGGAAAGCAGAGCATCGCGAATTGTTTGTTGTTTTGGGGTGAACCCGCGCGGCCATCATCGCGCGC
GCTCCGACCGCGGGCAGTCGTCATCGCTCGTCGCCGGCAGCAACCGCGGGTGCCAGCGCCGCCTCTTTCCAACAAACCGCGCCACCAACCCAATGACCCT
TGGAGGTCGGCGGGGGCGACACGGCCAAGGAGGAGCCGGCTCCGGCCGCCGCGGCGCAGCCGGACGGCGCGCTCGGATAAGATCAAGTAGTGTTCGTGAG
GGCCGAAACCCTAGCTTATTCGCCCTTCACCCGTGGCCTTTTATCACAGCGACGAACACTTGGGCCTCACAAGTCACCAGTTTTTCCTTCCTTCTATGGC
CGAGCACAATAGGTTCTCACCATACAATTGGGCCTCAACAACAACAACACAGGCCCAGACACCATAAACCAGACCTTTCGGCCCCACATGTCATTCTCTG
AGCGGCGCCGATCCGACAATCGTAAAACCCTAACTCTCCCAATCCAAGCTATAAAAGCGTTCCCCTCCTGTCTGTCCGCTCTATACGCCGCCATCTTCGC
AAGCCACCGCAACCGAAGCCCGCCTTCGCCGCCGCCGCCTCTGCGATCCCCGCAAGGTCGCAAACATGTCTACCGTGCTCCAGCGCCCGACCCCCGGCAC
GGTCCAGTGCTTCGGCCGCAAGAAGACGGCTGTGGCCGTCGCCTACACCAAGCCGGGGCGCGGGCTGATCAAGGTGAACGGCGTCCCGATTGAGCTCATC
AGGCCGGAGATGCTCCGCCTCAAGGCCTTCGAGCCCATCCTGCTGGCGGGGCGCTCCAGGTTCAAGGACATCGACATGAGGATCCGCGTCCGAGGCGGCG
GGAAGACGTCGCAGATCTACGCCATTCGCCAGGCCGTCGCCAAGGGGCTCGTCGCCTACTACCAGAAGTACGTCGACGAGGCCGCCAAGAAGGAGGTCAA
GGACATCTTCACCCGGTACGACCGCACCCTTCTCGTCGCCGACCCCAGGCGCTGCGAGCCGAAGAAGTTCGGTGGTCGCGGCGCCCGCGCCAGGTTCCAG
AAGTCCTACCGTTGAGCGCTCGGCTGCCCGCGCTTGCCGTACCGATGCCTGTGTTGTCCCAACTTGCCAGTTCGATGCCTGTACCCGTGGCTTAATTTTC
TATCATCGGAGCTACTTATGTGGTTCTATAACTAGATGCTGTTTTACCTTCAACTTGTGCTGTTGTACCTTCATATTTGGACTTTTTAAGCCTTGTGTCG
GACGCCTTTGGCATTGAAATATGAGAGATTTTGAAGACTATCTCTGAAGTTATGTGGTTCTATATCTAGATGTTGTTTCAGCTTGTTACTTGTGTTAATG
AATTTATGATATGTTTGTCATAAATTTATGATATGTACTGGTTGTTGCTATTCAGTTTTGCAGCACGTATTTTTCCTA
GGTCCAGCCGCGAATTCCTCCCGTCCCCACCCTCCTCCATATTCCCCACCCAATGTCCCGACCGGCCAACCCCCGACCCCGAAGCCCCAAACCCCTACCA
CCATTTCCCGGGAGTCTCCTTTCCCGGAGAGTGGATCCGCCACTCCAATCTGCACCATTCTATAAGGAAAACCTAGATCCGGACTCCTAGCCGTCGGCCA
TGGCCACGCGCCGGGCCTTCTCGTCCATCCTCCGCTCTGCCTCTCGCATTCGCTCCGCCTCACCGTCCCCATGCCCGCGTGCGCCGCTCCACCACCGCCC
GTCCCCCGCGGGCTTCATACTCAACCGTGTAGCCGCCTACGCCTCCTCCGCCACGGCCCAGGCCGCGCCCGCTCCGCCACCTCCTTCAACCGGCAAGAAA
ACCGGTGGCGGCAAGATCACCGATGAGTTCACCGGCGCTGGCGCCATCGGCCAGGTGTGCCAGGTCATCGGCGCCGTCGTGGATGTGCGCTTCGACGAGG
GGCTGCCCCCGATCCTGACGGCGCTTGAGGTGCTCGACAACAACATTCGCCTCGTGCTCGAGGTGGCGCAGCACCTCGGGGAGAACATGGTCCGCACCAT
CGCCATGGACGGGACAGAGGGGCTTGTTCGCGGCCAGCGTGTTCTCAACACCGGGTCTCCCATCACTGTTCCTGTTGGTAGGGCAACGCTTGGACGCATT
ATAAATGTTATTGGTGAGCCTATTGATGAGAAGGGAGATATAACAACAAACCACTTCCTCCCTATTCATCGTGAAGCCCCAGCCTTCGTCGAGCAAGCTA
CAGAGCAGCAAATTCTTGTTACTGGAATCAAGGTCGTGGATCTTCTTGCACCTTACCAAAGAGGTGGTAAAATTGGTCTCTTTGGTGGTGCAGGGGTGGG
AAAAACTGTCCTTATCATGGAGCTGATTAACAACGTTGCCAAGGCCCATGGTGGTTTCTCTGTCTTTGCTGGTGTTGGAGAACGTACTCGTGAGGGTAAT
GACTTGTACAGAGAAATGATTGAGAGTGGTGTCATTAAGCTTGACGATAAGCAGAGTGAGAGCAAGTGCGCTCTTGTCTACGGTCAAATGAACGAGCCAC
CTGGTGCCCGTGCTCGTGTTGGGCTGACTGGTTTGACTGTTGCTGAGCATTTCCGTGATGCTGAAGGACAGGATGTGCTTCTCTTCATCGACAACATTTT
CCGTTTCACTCAGGCAAACTCTGAGGTGTCTGCTCTGCTTGGGCGTATTCCATCTGCTGTGGGATACCAACCCACTCTTGCTACTGATCTTGGAGGACTG
CAGGAGCGGATTACTACCACAAAGAAGGGTTCTATTACATCTGTTCAAGCTATTTATGTGCCTGCTGATGACTTGACAGATCCTGCTCCTGCTACCACCT
TTGCCCATCTTGATGCTACTACTGTGTTGTCACGTCAGATTTCTGAGCTTGGTATTTACCCTGCCGTGGATCCTCTGGATTCCACATCCAGAATGTTGTC
CCCCCATGTTCTGGGTGAGGACCACTACAACACTGCTCGTGGTGTTCAGAAGGTTCTTCAGAATTACAAGAATCTCCAAGATATTATTGCCATTCTGGGA
ATGGATGAGCTCAGTGAAGATGACAAGTTGACAGTTGCTCGTGCTAGGAAGATTCAGCGGTTCCTTAGCCAGCCTTTCCATGTTGCTGAAGTTTTCACGG
GTGCACCTGGAAAGTACGTTGAGCTGAAGGAGAGTGTTAAAAGTTTCCAGGGCGTTTTGGATGGCAAGTATGATGACCTTCCAGAACAGTCATTCTACAT
GGTTGGAGGAATAGAGGAGGTCATCGCCAAGGCAGAGAAGATTGCCAAGGAATCTGCATCATAAGGGGTCTACAGGCAACGCAAAATTAACTTTTGGAGG
TCAACGTGATGTGCTTTTTATCCTGTGTTATCAAGAACTTACGTGCAGGAGACCCTGCCCTGCAGAAGGATGTTTCTCTCCTCCGTCCCCCCACCCCACA
CCCCAAAATAAGGATTCGCAGTGACATTTTAATTTGGTTTACTGCCCTTTGAGGAAGAATTACCTTTTTTGATGAGGTGAAACTATAACCTTGTTAATTC
TCAAACAAATACTCTTCTCCCATGTTCATAGCCATTATGAGGTCGCCTGTTCAATTTATTTTTCTGAGCCGAATAGCCGCTTCTACAGTTCGTTATCTGT
GTATAGTCTAGTTTTGTGATCCGTTTCCAACTCCAGTGTTTGGTTGGTAGGACGATAACGGATGAAATGTGTTTGG
ATCAAGCAGCAGGACAATTTGAAACAGAATAGACCGGCATTTAGACTCAATCATGTTACCAGTTTCAAAACAAAACGAACACAGCACGACACAAACATGT
TTCCAACATTCCAGACAAACTAAAAGGATCACCACCACAGGCAACTTGATCAACTAAACGATGCATATATCCTACTTAACAGTATTGCAGTAACATCGAT
ACAGATAATAGCATAAGTCTTCAGCAAGTTGCCATCAGTGAGGAAACTAGTGGGGAATAAAACACAAAGCCATAGCTAGATCTACTTCTCCGATGAGTTG
GGGCCGCGCTTCTTGCCGAATCCAACAACGGCGGTGACGAAGCGGCGGTTGTATTGCATGCGCTTGTGAGCGCGGCCGCGGGGCTTCTTCTTCTTGTCCT
GCTTTGCAACCTTGGGCGTCTGCCCGCGCACCTTCCCAGCGCGGGCCAGCGATCCGTGAACCTTACCTGCGCCAGAAGCAGATAGATCAATCTGAGTAAA
CGGCTATTGGAAGGATGCACGCAAAGTAGAGATAGAGACGAGGACAAGGATATCGTTACCCATGGCGGCGGCGGCGAAGGTGCTGTGTTGCTGGAGGATC
TGACGAGCGACTCGGGATGTTGCGGCGGCGGGGCTGTCCGAACGGTGCCCTAGACGGGTGGGAGAATTTATAAACGCCACGCTTTACTGGGCCGGCTGTT
TTGAGGCACATGCACATGTAAAATGCCCAGGCCCCGCTAACAGCCCAGTAACTACTAACTAGCCATATCCGCGAGAGAAACCCCTCGATAGCCCGCAGCA
TTGCGGCGCGCGAGCACACCGAACCACCCACCTCGGCGGCGGCGGCGGCTTTTCTGCCTGCGAAGAGAGAAACCAAGGAGAGGGGCAACTCGGAAGAGGG
CGAGGATGCCTCGGCCGGAGTTCCAGGCGCCGCCGGATGTGTTCTACAACGAGTCGGAGGCCCGCAAGTACACCACCTCCTCCCGTATCATCGAAATCCA
GTCTAGGATTTCCGAGAGGGCGCTGGAGTTGCTTGCTCTCCCCAACGATGGCGTCCCCAAGCTACTTCTCGACATAGGATGTGGTTCTGGACTTAGTGGT
GAGACATTGACGGAGCATGGCCACCACTGGATTGGCTACGATATTTCAAAGTCTATGCTCGATGTTGCCTTGGAGCGTGAAACGGAAGGAGACCTCCTAC
TTGCAGATATGGGGCAGGGCTTGGGCTTGCGGCCAGGAGTTATTGATGGTGCAATTAGTATTTCAGCAATTCAGTGGTTATGCAATGCTGACAAGTCTTC
TCACGATCCAAGATTGCGGTTAAAGGCTTTCTTCGGTTCATTATATAGATGCCTAGCAAGGGGAGCAAGAGCTGTTCTACAGTTTTATGCTGATAATGTG
AAGCAGAGTGAAATGATTGTGACTTTTGCCATGCGTGCTGGTTTTGCTGGTGGAGTGGTTGTTGACTGGCCTCATAGTTCAAAAGCGAAGAAGTCCTACC
TTGTCCTCACTTGTGGACCACCTTCAGTTACTACATCACTTCCAAAGGGTAAAGGTGAAAATGGTGAGGGGTGCAGCGACGATGACGATAATGAGAGCAG
TGGCGAAGATGGTGACAGAACAGTGGGAATATATGAAAGGAATAGGCCGAAGAAGCGGCAGAAAACGAAAAAGAATGGCAAAGGCAAGGATTGGCTCCTG
AGGAAAAAGGAGCAGATGAGAAGAAGAGGACATGATGTGCCCGCCGACACGAAGTACACCGGGCGTAAGCGGAAAGGCTATTTCTAGCTCTGTGCAATGC
CCCCTTGCCTGCAATGCTGGCTGTTCAGTTATGATGCTAGTTCATTTAGCAGAAGCAGAAGGATTTTTGTAAAGGGTGAAGCGAGGAGTTGTACTGGTAT
TCGGGAGTCATTGCATTTTTAGACAACGATGTGAAACTGTCATTTTTGTAGAACGTGGATGTTGAGATGAATACAGTTGGTTTGCGTGAATCTGTATCAG
ATCGCTGGTGACGCCCAGACTTTGGCTAAAAGAAACGCAGTTCATGTGTCAAGT
CACAAGTCGAGGGCCACCGCTCCGCATCCGCATCTTCTTCCAGAGCAAGTCGAGCGCGGCGGCCACAAAACCCAGTCCCATACGCACCCGTCCGTTCCGC
GCGATCAGCCGAGCGATGTCGTCGTCGGCGCCCGCACCGGCCGCCATGGCCGTGGACGACGCGGAGGACGACCAGCTCGCCTCCATGTCCACGGAGGAGA
TCACCAGGGCCTCCCGTCTCCTCGACAACGAGATCCGCGTCCACAAGGACGAGCTGCAGCGGTCGAACCTGGAGCTGGAGTCTATCAAGGAGAAGACCAA
GGAGAACCAGGAGAAGATTAAGCTCAACAAGCAGCTGCCGTACCTCGTCGGCAACATCGTCGAGATTTTGGAAATGAACCCTGAGGATGAGGCTGAAGAA
GATGGTGCTAACATCGATCTGGACTCACAAAGGAAAGGAAAATGTGTTGTTCTGAAGACATCCACCAGACAAACCATATTCCTTCCTGTAATTGGGTTAG
TTGACCCCGATAAGCTAAAGCCTGGCGATTTAGTTGGAGTTAACAAAGACAGCTACTTGATACTAGATACATTGCCTTCAGAGTATGACTCACGGGTTAA
GGCAATGGAAGTAGATGAGAAACCTACTGAGGATTACAATGACATTGGCGGACTTGAGAAACAGATTCAAGAGCTTGTGGAAGCAATAGTGTTACCAATG
ACACACAAGGACCGATTTCAAAAATTGGGCATTCGTCCCCCCAAAGGGGTTCTTTTGTATGGACCCCCTGGGACTGGGAAAACGCTCATGGCTCGTGCAT
GCGCTGCACAGACAAATGCAACATTTCTGAAATTGGCTGGTCCACAACTTGTCCAGATGTTCATTGGTGATGGAGCTAAGCTTGTTAGAGATGCTTTTCA
GCTTGCTAAGGAGAAAGCCCCGTGCATCATCTTTATTGATGAAATTGATGCCATTGGAACAAAGCGTTTTGACAGTGAAGTTAGTGGTGATAGAGAAGTG
CAAAGGACAATGTTGGAATTGCTGAACCAGCTTGATGGATTTAGCAGCGATGAGAGGATAAAGGTGATAGCTGCAACAAATCGTGCTGATATTCTTGATC
CTGCTCTGATGAGATCTGGTCGTCTGGACCGGAAGATTGAGTTCCCTCATCCATCAGAGGAAGCAAGAGCTAGAATCCTGCAGATCCACTCGAGGAAAAT
GAATGTGAATCCAGATGTCAACTTTGAAGAGTTGGCGCGTTCAACCGATGATTTCAATGGCGCTCAGCTAAAGGCTGTTTGCGTAGAGGCTGGCATGCTC
GCTCTACGCCGAGATGCTACAGAGGTTACCCACGAGGATTTCAACGAGGGGATCATCCAAGTGCAGGCAAAGAAGAAGTCCAGCTTGAATTACTACGCGG
GGGAACGCCCCGTACTTGGTGATCATTCAGTTGTTTGTGACACTGCCATTGTCTGGGCAGGCTAACTTACTATTTGTACTATAAGCAAGCTGTTGCTTTT
GAGTCTTACTCCGTATGAGAGTATCATTTATGAAATATTAACCAAGTCTGCCTGCCGTATTGGTTTCTTT
CTAGTCCACTCTTCTGGTCCTCTCGCTTTTGCGCTCCCTTGGTCGTCTTCGTCCCCTGCTCGTCTCCCGTCCGTTTTCGGATGCCCACTCCGACCAAAAC
CCTAGCTACTTCGTGAAGGTGGAGGGGAGGAGATGGCGGCAGCGGATGGGCGCAGCGGCGACTTCCGGGTCAGGGGTGGCAGCGTTGGGGGTCGGATCGA
CCGACTGGTGGTGGAGAACTTCAAGTCGTACAAGGGTGAGCAGACGATTGGGCCTTTCGTCGACTTCACAGCCATCATCGGCCCTAACGGCGCCGGCAAG
TCCAACCTGATGGACGCCATCAGCTTCGTGCTGGGCGTGCGCTCAACGCACCTTCGAGGCGCGCAGCTCAAGGACCTCATTTACGCCCTCGACGACCGCG
ACAAGGAGGCCAAGGGCCGCAAGGCTTCCGTCCGCCTCTTCTACTGCCAACCCAACCAGGAGGAGCTCTGCTTCACCCGCAGCATCACCGGCGCCGGCGG
CAGTGAGTACCGCATCGACCGCAACCAAGTCACCTGGGACGTCTACAACGCCAAGCTCAGGTCCCTCGGCATCCTCGTCAAGGCCCGCAACTTCCTCGTC
TTTCAGGGTGATGTAGAATCCATTGCCTCCAAGAACCCCAAGGAGCTCACCGCTCTCCTGGAGCAGATCTCAGGCTCTGATGAGCTTAGGAGGGAGTATG
ACGAGCTGGAGGAGCAGAAAGCCAGGGCCGAAGAGAAGTCTGCTCTTGTGTATCAAGAGAAAAGGACCATTGTCATGGAGCGGAAGCAGAAGAAGGTGCA
AAAAGAGGAGGCAGAGAAGCATCTACGCCTTCAACAGGACCTGAAACTGTTGAAGACAGAGCATTACCTTTGGCAACTCTATACCATCGAAAAAGACATA
GAGAAAATTGAAGCTGAGCTTGTGGAGGATAGAGAATCTCTTCAGCAAGTGCAGGAAGAGAATCGATCCAGTGACTATGAACTGACTGCAAAAAAGAAGG
AGCAAAGTGCATTTCTCAAGAAAATCACATTGTCTGAGAAAAGCATAACCAAGAAAAAGCTTGAACTCGACAAGAAGCAACCTGAGCTTCTTAAATTAAA
AGAGCAAATATCTCGTCTCAAATCAAAAATCAAAAGTTGCAAGAAAGAGATTGACAAAAAGAAGGATGATCACAAAAAACATCTTGGAGAGCTGAGAAGG
CTGCAAAGTGATCTGGTTGAGGTCACAGAAGCTATTGAGGAATTGAATGAGCAAGGACAAGATACAAGTGGAAAACTGTTATTAGCCGACGACCAACTCC
AGGAGTATCATAGAATGTGAGTGTGACTAGACATCTTATGTGCAGCGTTGATTTTATATTTAGTCTATCTAGGCGTCAGCACACATGCGGTGTATTATTA
TTCTAGGATAGGAAGAACATTTGTGCCTATGAGTTGAGTTGTACTGTTTTGTCTCAGATGTGTACTGGGGGCTAATGTTTTATTTAAAGTGTGGATGACT
TGGACGCAC
